# Supplementary material
Source: PubMed Central journal article supplement (PMC4701543)
Supplement: JCI79639.sd.pdf [file JCI79639.sd.pdf]

Supplemental Figure 1

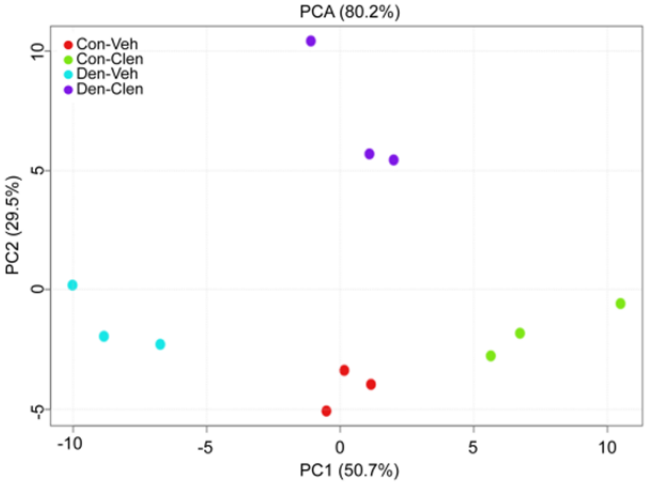

**Supplemental Figure 1** Principal component analysis (PCA) of muscle tissue protein FSRs for the contralateral limb in vehicle-treated (Con-Veh, n=3) and clenbuterol-treated (Con-Clen, n=3) rats, as well as denervated limb in vehicle-treated (Den-Veh) and clenbuterol-treated (Den-Clen) rats.

Supplemental Table 1: Correlation of fractional synthesis of creatine-kinase M-type (CK-M) and carbonic anhydrase 3 (CA-3) with that of muscle proteins in rat gastrocnemius. Pearson correlation coefficients between fractional synthesis of CK-M and CA-3 in the rat gastrocnemius muscle or plasma and fractional syntheses of other proteins measured in the gastrocnemius muscle.

| Gastrocnemius Muscle Proteins                               | Muscle CK-M fractional synthesis vs. other gastrocnemius muscle proteins fractional synthesis: Pearson correlation coefficient r, two-tailed p-value, n | Plasma CK-M fractional synthesis vs. other gastrocnemius muscle proteins fractional synthesis: Pearson correlation coefficient r, two-tailed p-value, n | Muscle CA-3 fractional synthesis vs. other gastrocnemius muscle proteins fractional synthesis: Pearson correlation coefficient r, two-tailed p-value, n | Plasma CA-3 fractional synthesis vs. other gastrocnemius muscle proteins fractional synthesis: Pearson correlation coefficient r, two-tailed p-value, n |
|-------------------------------------------------------------|---------------------------------------------------------------------------------------------------------------------------------------------------------|---------------------------------------------------------------------------------------------------------------------------------------------------------|---------------------------------------------------------------------------------------------------------------------------------------------------------|---------------------------------------------------------------------------------------------------------------------------------------------------------|
| 2-oxoglutarate dehydrogenase, mitochondrial                 | r = 0.958, p < 0.0001, n = 17                                                                                                                           | r = 0.9748, p < 0.0001, n = 15                                                                                                                          | r = 0.9321, p < 0.0001, n = 17                                                                                                                          | r = 0.9488, p < 0.0001, n = 17                                                                                                                          |
| 3-mercaptopyruvate sulfurtransferase                        | r = 0.8819, p < 0.0001, n = 13                                                                                                                          | r = 0.9202, p < 0.0001, n = 12                                                                                                                          | r = 0.7977, p < 0.005, n = 13                                                                                                                           | r = 0.8444, p < 0.0005, n = 13                                                                                                                          |
| 60 kDa heat shock protein, mitochondrial                    | r = 0.9126, p < 0.0001, n = 16                                                                                                                          | r = 0.931, p < 0.0001, n = 14                                                                                                                           | r = 0.8324, p < 0.0001, n = 16                                                                                                                          | r = 0.8094, p < 0.0001, n = 16                                                                                                                          |
| Aconitate hydratase, mitochondrial                          | r = 0.9314, p < 0.0001, n = 24                                                                                                                          | r = 0.948, p < 0.0001, n = 22                                                                                                                           | r = 0.8418, p < 0.0001, n = 24                                                                                                                          | r = 0.8761, p < 0.0001, n = 24                                                                                                                          |
| Actin                                                       | r = 0.8741, p < 0.0001, n = 24                                                                                                                          | r = 0.857, p < 0.0001, n = 22                                                                                                                           | r = 0.9257, p < 0.0001, n = 24                                                                                                                          | r = 0.882, p < 0.0001, n = 24                                                                                                                           |
| Adenylate kinase isoenzyme 1                                | r = 0.9957, p < 0.0001, n = 24                                                                                                                          | r = 0.9687, p < 0.0001, n = 22                                                                                                                          | r = 0.9073, p < 0.0001, n = 24                                                                                                                          | r = 0.9737, p < 0.0001, n = 24                                                                                                                          |
| ADP/ATP translocase 1                                       | r = 0.9263, p < 0.0001, n = 20                                                                                                                          | r = 0.933, p < 0.0001, n = 18                                                                                                                           | r = 0.9322, p < 0.0001, n = 20                                                                                                                          | r = 0.9068, p < 0.0001, n = 20                                                                                                                          |
| Alpha-enolase                                               | r = 0.982, p < 0.0001, n = 24                                                                                                                           | r = 0.972, p < 0.0001, n = 22                                                                                                                           | r = 0.8705, p < 0.0001, n = 24                                                                                                                          | r = 0.9353, p < 0.0001, n = 24                                                                                                                          |
| Aspartate aminotransferase, cytoplasmic                     | r = 0.8461, p < 0.0001, n = 24                                                                                                                          | r = 0.8571, p < 0.0001, n = 22                                                                                                                          | r = 0.6658, p < 0.0005, n = 24                                                                                                                          | r = 0.8051, p < 0.0001, n = 24                                                                                                                          |
| Aspartate aminotransferase, mitochondrial                   | r = 0.9568, p < 0.0001, n = 24                                                                                                                          | r = 0.961, p < 0.0001, n = 22                                                                                                                           | r = 0.9204, p < 0.0001, n = 24                                                                                                                          | r = 0.9179, p < 0.0001, n = 24                                                                                                                          |
| ATP synthase subunit alpha, mitochondrial                   | r = 0.9182, p < 0.0001, n = 24                                                                                                                          | r = 0.9286, p < 0.0001, n = 22                                                                                                                          | r = 0.8368, p < 0.0001, n = 24                                                                                                                          | r = 0.881, p < 0.0001, n = 24                                                                                                                           |
| ATP synthase subunit beta, mitochondrial                    | r = 0.9548, p < 0.0001, n = 24                                                                                                                          | r = 0.965, p < 0.0001, n = 22                                                                                                                           | r = 0.8629, p < 0.0001, n = 24                                                                                                                          | r = 0.9174, p < 0.0001, n = 24                                                                                                                          |
| Beta-enolase                                                | r = 0.9887, p < 0.0001, n = 24                                                                                                                          | r = 0.9811, p < 0.0001, n = 22                                                                                                                          | r = 0.8657, p < 0.0001, n = 24                                                                                                                          | r = 0.9433, p < 0.0001, n = 24                                                                                                                          |
| Carbonic anhydrase 3                                        | r = 0.914, p < 0.0001, n = 24                                                                                                                           | r = 0.8977, p < 0.0001, n = 22                                                                                                                          | r = 1                                                                                                                                                   | r = 0.9038, p < 0.0001, n = 24                                                                                                                          |
| Citrate synthase, mitochondrial                             | r = 0.9524, p < 0.0001, n = 14                                                                                                                          | r = 0.9505, p < 0.0001, n = 12                                                                                                                          | r = 0.9155, p < 0.0001, n = 14                                                                                                                          | r = 0.8727, p < 0.0001, n = 14                                                                                                                          |
| Creatine kinase M-type                                      | r = 1                                                                                                                                                   | r = 0.9771, p < 0.0001, n = 22                                                                                                                          | r = 0.914, p < 0.0001, n = 24                                                                                                                           | r = 0.9688, p < 0.0001, n = 24                                                                                                                          |
| Creatine kinase S-type, mitochondrial                       | r = 0.8289, p < 0.0001, n = 23                                                                                                                          | r = 0.8336, p < 0.0001, n = 21                                                                                                                          | r = 0.6496, p < 0.001, n = 23                                                                                                                           | r = 0.8099, p < 0.0001, n = 23                                                                                                                          |
| Cytochrome c oxidase subunit 5A, mitochondrial              | r = 0.9465, p < 0.0001, n = 19                                                                                                                          | r = 0.937, p < 0.0001, n = 17                                                                                                                           | r = 0.7961, p < 0.0001, n = 19                                                                                                                          | r = 0.9033, p < 0.0001, n = 19                                                                                                                          |
| Dihydrolipoyl dehydrogenase, mitochondrial                  | r = 0.7097, p < 0.005, n = 15                                                                                                                           | r = 0.6923, p < 0.01, n = 14                                                                                                                            | r = 0.6604, p < 0.01, n = 15                                                                                                                            | r = 0.6735, p < 0.01, n = 15                                                                                                                            |
| Electron transfer flavoprotein subunit alpha, mitochondrial | r = 0.8915, p < 0.0001, n = 23                                                                                                                          | r = 0.8266, p < 0.0001, n = 21                                                                                                                          | r = 0.7398, p < 0.0001, n = 23                                                                                                                          | r = 0.8748, p < 0.0001, n = 23                                                                                                                          |
| Fatty acid-binding protein, heart                           | r = 0.8732, p < 0.0001, n = 17                                                                                                                          | r = 0.8673, p < 0.0001, n = 15                                                                                                                          | r = 0.757, p < 0.0005, n = 17                                                                                                                           | r = 0.845, p < 0.0005, n = 17                                                                                                                           |
| Four and a half LIM domains protein 1                       | r = 0.9624, p < 0.0001, n = 20                                                                                                                          | r = 0.945, p < 0.0001, n = 18                                                                                                                           | r = 0.9423, p < 0.0001, n = 20                                                                                                                          | r = 0.9322, p < 0.0001, n = 20                                                                                                                          |
| Fructose-bisphosphate aldolase A                            | r = 0.9945, p < 0.0001, n = 24                                                                                                                          | r = 0.9799, p < 0.0001, n = 22                                                                                                                          | r = 0.8912, p < 0.0001, n = 24                                                                                                                          | r = 0.9558, p < 0.0001, n = 24                                                                                                                          |
| Fumarate hydratase, mitochondrial                           | r = 0.9218, p < 0.0001, n = 23                                                                                                                          | r = 0.9267, p < 0.0001, n = 21                                                                                                                          | r = 0.8103, p < 0.0001, n = 23                                                                                                                          | r = 0.8588, p < 0.0001, n = 23                                                                                                                          |
| Galectin-1                                                  | r = 0.8867, p < 0.0001, n = 22                                                                                                                          | r = 0.8502, p < 0.0001, n = 20                                                                                                                          | r = 0.9022, p < 0.0001, n = 22                                                                                                                          | r = 0.8593, p < 0.0001, n = 22                                                                                                                          |
| Glucose-6-phosphate isomerase                               | r = 0.9911, p < 0.0001, n = 24                                                                                                                          | r = 0.9705, p < 0.0001, n = 22                                                                                                                          | r = 0.8765, p < 0.0001, n = 24                                                                                                                          | r = 0.9612, p < 0.0001, n = 24                                                                                                                          |
| Glyceraldehyde-3-phosphate dehydrogenase                    | r = 0.9802, p < 0.0001, n = 24                                                                                                                          | r = 0.9735, p < 0.0001, n = 22                                                                                                                          | r = 0.8469, p < 0.0001, n = 24                                                                                                                          | r = 0.9427, p < 0.0001, n = 24                                                                                                                          |
| Glycerol-3-phosphate dehydrogenase [NAD+], cytoplasmic      | r = 0.9793, p < 0.0001, n = 24                                                                                                                          | r = 0.9673, p < 0.0001, n = 22                                                                                                                          | r = 0.8857, p < 0.0001, n = 24                                                                                                                          | r = 0.9444, p < 0.0001, n = 24                                                                                                                          |
| Glycogen phosphorylase, muscle form                         | r = 0.9887, p < 0.0001, n = 24                                                                                                                          | r = 0.9712, p < 0.0001, n = 22                                                                                                                          | r = 0.8666, p < 0.0001, n = 24                                                                                                                          | r = 0.9542, p < 0.0001, n = 24                                                                                                                          |
| GTP-binding protein SAR1b                                   | r = 0.7995, p < 0.0001, n = 22                                                                                                                          | r = 0.839, p < 0.0001, n = 20                                                                                                                           | r = 0.6263, p < 0.005, n = 22                                                                                                                           | r = 0.772, p < 0.0001, n = 22                                                                                                                           |
| Heat shock cognate 71 kDa protein                           | r = 0.9681, p < 0.0001, n = 24                                                                                                                          | r = 0.9575, p < 0.0001, n = 22                                                                                                                          | r = 0.9181, p < 0.0001, n = 24                                                                                                                          | r = 0.9621, p < 0.0001, n = 24                                                                                                                          |
| Heat shock-related 70 kDa protein 2                         | r = 0.9567, p < 0.0001, n = 22                                                                                                                          | r = 0.9477, p < 0.0001, n = 20                                                                                                                          | r = 0.8899, p < 0.0001, n = 22                                                                                                                          | r = 0.9464, p < 0.0001, n = 22                                                                                                                          |
| Histidine triad nucleotide-binding protein 1                | r = 0.9799, p < 0.0001, n = 20                                                                                                                          | r = 0.9634, p < 0.0001, n = 18                                                                                                                          | r = 0.8707, p < 0.0001, n = 20                                                                                                                          | r = 0.9651, p < 0.0001, n = 20                                                                                                                          |
| Isocitrate dehydrogenase [NAD] subunit alpha, mitochondrial | r = 0.9153, p < 0.0001, n = 16                                                                                                                          | r = 0.9273, p < 0.0001, n = 14                                                                                                                          | r = 0.7567, p < 0.001, n = 16                                                                                                                           | r = 0.8713, p < 0.0001, n = 16                                                                                                                          |
| Isocitrate dehydrogenase [NADP], mitochondrial              | r = 0.8735, p < 0.0001, n = 23                                                                                                                          | r = 0.8783, p < 0.0001, n = 21                                                                                                                          | r = 0.7557, p < 0.0001, n = 23                                                                                                                          | r = 0.8267, p < 0.0001, n = 23                                                                                                                          |
| L-lactate dehydrogenase A chain                             | r = 0.9955, p < 0.0001, n = 24                                                                                                                          | r = 0.9738, p < 0.0001, n = 22                                                                                                                          | r = 0.9005, p < 0.0001, n = 24                                                                                                                          | r = 0.9617, p < 0.0001, n = 24                                                                                                                          |
| L-lactate dehydrogenase B chain                             | r = 0.9332, p < 0.0001, n = 12                                                                                                                          | r = 0.8535, p < 0.005, n = 10                                                                                                                           | r = 0.8208, p < 0.005, n = 12                                                                                                                           | r = 0.9412, p < 0.0001, n = 12                                                                                                                          |
| Malate dehydrogenase, cytoplasmic                           | r = 0.9082, p < 0.0001, n = 24                                                                                                                          | r = 0.905, p < 0.0001, n = 22                                                                                                                           | r = 0.7289, p < 0.0001, n = 24                                                                                                                          | r = 0.8408, p < 0.0001, n = 24                                                                                                                          |
| Malate dehydrogenase, mitochondrial                         | r = 0.9445, p < 0.0001, n = 24                                                                                                                          | r = 0.9549, p < 0.0001, n = 22                                                                                                                          | r = 0.8911, p < 0.0001, n = 24                                                                                                                          | r = 0.9116, p < 0.0001, n = 24                                                                                                                          |
| Myoglobin                                                   | r = 0.8057, p < 0.0001, n = 24                                                                                                                          | r = 0.8331, p < 0.0001, n = 22                                                                                                                          | r = 0.6355, p < 0.001, n = 24                                                                                                                           | r = 0.7721, p < 0.0001, n = 24                                                                                                                          |
| Myosin light chain 1/3, skeletal muscle isoform             | r = 0.9597, p < 0.0001, n = 24                                                                                                                          | r = 0.9404, p < 0.0001, n = 22                                                                                                                          | r = 0.8997, p < 0.0001, n = 24                                                                                                                          | r = 0.9436, p < 0.0001, n = 24                                                                                                                          |
| Nucleoside diphosphate kinase A                             | r = 0.9734, p < 0.0001, n = 13                                                                                                                          | r = 0.9262, p < 0.0001, n = 11                                                                                                                          | r = 0.9456, p < 0.0001, n = 13                                                                                                                          | r = 0.9653, p < 0.0001, n = 13                                                                                                                          |
| Nucleoside diphosphate kinase B                             | r = 0.9432, p < 0.0001, n = 22                                                                                                                          | r = 0.9481, p < 0.0001, n = 20                                                                                                                          | r = 0.8873, p < 0.0001, n = 22                                                                                                                          | r = 0.9403, p < 0.0001, n = 22                                                                                                                          |
| Parvalbumin alpha                                           | r = 0.9357, p < 0.0001, n = 24                                                                                                                          | r = 0.8887, p < 0.0001, n = 22                                                                                                                          | r = 0.9148, p < 0.0001, n = 24                                                                                                                          | r = 0.9169, p < 0.0001, n = 24                                                                                                                          |
| Peroxiredoxin-2                                             | r = 0.9547, p < 0.0001, n = 21                                                                                                                          | r = 0.9591, p < 0.0001, n = 19                                                                                                                          | r = 0.8336, p < 0.0001, n = 21                                                                                                                          | r = 0.9252, p < 0.0001, n = 21                                                                                                                          |
| Phosphatidylethanolamine-binding protein 1                  | r = 0.9032, p < 0.0001, n = 21                                                                                                                          | r = 0.9147, p < 0.0001, n = 19                                                                                                                          | r = 0.8015, p < 0.0001, n = 21                                                                                                                          | r = 0.8852, p < 0.0001, n = 21                                                                                                                          |
| Phosphoglucosmutase-1                                       | r = 0.9812, p < 0.0001, n = 24                                                                                                                          | r = 0.9759, p < 0.0001, n = 22                                                                                                                          | r = 0.8592, p < 0.0001, n = 24                                                                                                                          | r = 0.9499, p < 0.0001, n = 24                                                                                                                          |
| Phosphoglycerate kinase 1                                   | r = 0.9942, p < 0.0001, n = 24                                                                                                                          | r = 0.9837, p < 0.0001, n = 22                                                                                                                          | r = 0.9042, p < 0.0001, n = 24                                                                                                                          | r = 0.9666, p < 0.0001, n = 24                                                                                                                          |
| Phosphoglycerate mutase 1                                   | r = 0.9937, p < 0.0001, n = 24                                                                                                                          | r = 0.9739, p < 0.0001, n = 22                                                                                                                          | r = 0.9017, p < 0.0001, n = 24                                                                                                                          | r = 0.9677, p < 0.0001, n = 24                                                                                                                          |
| Phosphoglycerate mutase 2                                   | r = 0.9935, p < 0.0001, n = 24                                                                                                                          | r = 0.9791, p < 0.0001, n = 22                                                                                                                          | r = 0.8939, p < 0.0001, n = 24                                                                                                                          | r = 0.9722, p < 0.0001, n = 24                                                                                                                          |
| Profilin-1                                                  | r = 0.7676, p < 0.005, n = 13                                                                                                                           | r = 0.745, p < 0.01, n = 11                                                                                                                             | r = 0.832, p < 0.0005, n = 13                                                                                                                           | r = 0.767, p < 0.005, n = 13                                                                                                                            |
| Protein DJ-1                                                | r = 0.9826, p < 0.0001, n = 24                                                                                                                          | r = 0.968, p < 0.0001, n = 22                                                                                                                           | r = 0.9107, p < 0.0001, n = 24                                                                                                                          | r = 0.9586, p < 0.0001, n = 24                                                                                                                          |
| Protein NDRG2                                               | r = 0.8866, p < 0.0001, n = 20                                                                                                                          | r = 0.8296, p < 0.0001, n = 18                                                                                                                          | r = 0.6632, p < 0.005, n = 20                                                                                                                           | r = 0.8339, p < 0.0001, n = 20                                                                                                                          |
| Pyruvate kinase isozymes M1/M2                              | r = 0.9897, p < 0.001, n = 24                                                                                                                           | r = 0.9768, p < 0.001, n = 22                                                                                                                           | r = 0.8682, p < 0.001, n = 24                                                                                                                           | r = 0.9562, p < 0.0001, n = 24                                                                                                                          |
| Rho GDP-dissociation inhibitor 1                            | r = 0.9314, p < 0.001, n = 8                                                                                                                            | r = 0.8882, p < 0.01, n = 7                                                                                                                             | r = 0.9176, p < 0.005, n = 8                                                                                                                            | r = 0.8088, p < 0.05, n = 8                                                                                                                             |
| Sarcoplasmic/endoplasmic reticulum calcium ATPase 1         | r = 0.9888, p < 0.0001, n = 24                                                                                                                          | r = 0.9813, p < 0.0001, n = 22                                                                                                                          | r = 0.8848, p < 0.0001, n = 24                                                                                                                          | r = 0.9598, p < 0.0001, n = 24                                                                                                                          |
| Superoxide dismutase [Cu-Zn]                                | r = 0.903, p < 0.0001, n = 20                                                                                                                           | r = 0.8624, p < 0.0001, n = 18                                                                                                                          | r = 0.7654, p < 0.0001, n = 20                                                                                                                          | r = 0.8689, p < 0.0001, n = 20                                                                                                                          |
| Triosephosphate isomerase                                   | r = 0.9928, p < 0.0001, n = 24                                                                                                                          | r = 0.9863, p < 0.0001, n = 22                                                                                                                          | r = 0.8921, p < 0.0001, n = 24                                                                                                                          | r = 0.9591, p < 0.0001, n = 24                                                                                                                          |
| Tripartite motif-containing protein 72                      | r = 0.8728, p < 0.0001, n = 21                                                                                                                          | r = 0.8844, p < 0.0001, n = 19                                                                                                                          | r = 0.7823, p < 0.0001, n = 21                                                                                                                          | r = 0.8451, p < 0.0001, n = 21                                                                                                                          |
| Tropomyosin alpha-1 chain                                   | r = 0.844, p < 0.0001, n = 15                                                                                                                           | r = 0.8033, p < 0.001, n = 14                                                                                                                           | r = 0.802, p < 0.0005, n = 15                                                                                                                           | r = 0.8885, p < 0.0001, n = 15                                                                                                                          |
| Tubulin alpha-1B chain                                      | r = 0.9127, p < 0.0001, n = 12                                                                                                                          | r = 0.9038, p < 0.005, n = 10                                                                                                                           | r = 0.933, p < 0.0001, n = 12                                                                                                                           | r = 0.902, p < 0.0001, n = 12                                                                                                                           |

Supplemental Table 2: Correlation of fractional synthesis of creatine kinase M-type (CK-M) and carbonic anhydrase 3 (CA-3) with that of muscle proteins in rat quadriceps. Pearson correlation coefficients between fractional synthesis of CK-M and CA-3 in the rat quadriceps muscle or plasma and fractional syntheses of other proteins measured in the quadriceps muscle.

| Quadriceps Muscle Proteins                          | Muscle CK-M fractional synthesis vs. other quadriceps muscle proteins fractional synthesis: Pearson correlation coefficient r, two-tailed p-value, n | Plasma CK-M fractional synthesis vs. other quadriceps muscle proteins fractional synthesis: Pearson correlation coefficient r, two-tailed p-value, n | Muscle CA-3 fractional synthesis vs. other quadriceps muscle proteins fractional synthesis: Pearson correlation coefficient r, two-tailed p-value, n | Plasma CA-3 fractional synthesis vs. other quadriceps muscle proteins fractional synthesis: Pearson correlation coefficient r, two-tailed p-value, n |
|-----------------------------------------------------|------------------------------------------------------------------------------------------------------------------------------------------------------|------------------------------------------------------------------------------------------------------------------------------------------------------|------------------------------------------------------------------------------------------------------------------------------------------------------|------------------------------------------------------------------------------------------------------------------------------------------------------|
| Aconitate hydratase, mitochondrial                  | r = 0.9508, p < 0.0001, n = 20                                                                                                                       | r = 0.949, p < 0.0001, n = 18                                                                                                                        | r = 0.8317, p < 0.0001, n = 20                                                                                                                       | r = 0.9128, p < 0.0001, n = 20                                                                                                                       |
| Actin                                               | r = 0.9778, p < 0.0001, n = 23                                                                                                                       | r = 0.9541, p < 0.0001, n = 22                                                                                                                       | r = 0.9063, p < 0.0001, n = 23                                                                                                                       | r = 0.9479, p < 0.0001, n = 23                                                                                                                       |
| Adenylate kinase isoenzyme 1                        | r = 0.9784, p < 0.0001, n = 24                                                                                                                       | r = 0.9735, p < 0.0001, n = 22                                                                                                                       | r = 0.8392, p < 0.0001, n = 24                                                                                                                       | r = 0.9454, p < 0.001, n = 24                                                                                                                        |
| Aspartate aminotransferase, cytoplasmic             | r = 0.8018, p < 0.0001, n = 20                                                                                                                       | r = 0.7825, p < 0.0001, n = 18                                                                                                                       | r = 0.469, p < 0.05, n = 20                                                                                                                          | r = 0.7299, p < 0.005, n = 20                                                                                                                        |
| Beta-enolase                                        | r = 0.9919, p < 0.0001, n = 24                                                                                                                       | r = 0.9788, p < 0.0001, n = 22                                                                                                                       | r = 0.8088, p < 0.0001, n = 24                                                                                                                       | r = 0.9357, p < 0.0001, n = 24                                                                                                                       |
| Carbonic anhydrase 3                                | r = 0.8647, p < 0.0001, n = 20                                                                                                                       | r = 0.86, p < 0.0001, n = 18                                                                                                                         | r = 1                                                                                                                                                | r = 0.8819, p < 0.0001, n = 24                                                                                                                       |
| Creatine Kinase M-type                              | r = 1                                                                                                                                                | r = 0.9844, p < 0.0001, n = 22                                                                                                                       | r = 0.8647, p < 0.0001, n = 24                                                                                                                       | r = 0.9512, p < 0.0001, n = 24                                                                                                                       |
| Fructose-bisphosphate aldolase A                    | r = 0.9966, p < 0.0001, n = 24                                                                                                                       | r = 0.9838, p < 0.0001, n = 22                                                                                                                       | r = 0.8478, p < 0.0001, n = 24                                                                                                                       | r = 0.9474, p < 0.0001, n = 24                                                                                                                       |
| Glucose-6-phosphate isomerase                       | r = 0.9895, p < 0.0001, n = 24                                                                                                                       | r = 0.9895, p < 0.0001, n = 22                                                                                                                       | r = 0.8466, p < 0.0001, n = 24                                                                                                                       | r = 0.9517, p < 0.0001, n = 24                                                                                                                       |
| Glyceraldehyde-3-phosphate dehydrogenase            | r = 0.9873, p < 0.0001, n = 24                                                                                                                       | r = 0.9762, p < 0.0001, n = 22                                                                                                                       | r = 0.804, p < 0.0001, n = 24                                                                                                                        | r = 0.9316, p < 0.0001, n = 24                                                                                                                       |
| Glycogen phosphorylase, muscle form                 | r = 0.9915, p < 0.0001, n = 24                                                                                                                       | r = 0.9831, p < 0.0001, n = 22                                                                                                                       | r = 0.82, p < 0.0001, n = 24                                                                                                                         | r = 0.9489, p < 0.0001, n = 24                                                                                                                       |
| L-lactate dehydrogenase A chain                     | r = 0.9916, p < 0.0001, n = 24                                                                                                                       | r = 0.9821, p < 0.0001, n = 22                                                                                                                       | r = 0.8445, p < 0.0001, n = 24                                                                                                                       | r = 0.9489, p < 0.0001, n = 24                                                                                                                       |
| Malate dehydrogenase, mitochondrial                 | r = 0.9432, p < 0.0001, n = 21                                                                                                                       | r = 0.9418, p < 0.0001, n = 19                                                                                                                       | r = 0.7594, p < 0.0005, n = 21                                                                                                                       | r = 0.9106, p < 0.0001, n = 21                                                                                                                       |
| Myoglobin                                           | r = 0.7591, p < 0.0001, n = 24                                                                                                                       | r = 0.7649, p < 0.0001, n = 22                                                                                                                       | r = 0.4823, p < 0.05, n = 24                                                                                                                         | r = 0.715, p < 0.0001, n = 24                                                                                                                        |
| Myosin Light Chain-1/3                              | r = 0.9834, p < 0.0001, n = 24                                                                                                                       | r = 0.9749, p < 0.0001, n = 22                                                                                                                       | r = 0.865, p < 0.0001, n = 24                                                                                                                        | r = 0.9511, p < 0.0001, n = 24                                                                                                                       |
| Parvalbumin alpha                                   | r = 0.9588, p < 0.0001, n = 24                                                                                                                       | r = 0.9347, p < 0.0001, n = 22                                                                                                                       | r = 0.8939, p < 0.0001, n = 24                                                                                                                       | r = 0.9327, p < 0.0001, n = 24                                                                                                                       |
| Phosphoglucomutase-1                                | r = 0.9631, p < 0.0001, n = 24                                                                                                                       | r = 0.9518, p < 0.0001, n = 22                                                                                                                       | r = 0.7644, p < 0.0001, n = 24                                                                                                                       | r = 0.9197, p < 0.0001, n = 24                                                                                                                       |
| Phosphoglycerate kinase 1                           | r = 0.9654, p < 0.0001, n = 24                                                                                                                       | r = 0.9601, p < 0.0001, n = 22                                                                                                                       | r = 0.7792, p < 0.0001, n = 24                                                                                                                       | r = 0.8947, p < 0.0001, n = 24                                                                                                                       |
| Phosphoglycerate mutase 2                           | r = 0.995, p < 0.0001, n = 24                                                                                                                        | r = 0.9857, p < 0.0001, n = 22                                                                                                                       | r = 0.8514, p < 0.0001, n = 24                                                                                                                       | r = 0.9446, p < 0.0001, n = 24                                                                                                                       |
| Pyruvate Kinase M1/M2                               | r = 0.9886, p < 0.0001, n = 24                                                                                                                       | r = 0.9783, p < 0.0001, n = 22                                                                                                                       | r = 0.8098, p < 0.0001, n = 24                                                                                                                       | r = 0.933, p < 0.0001, n = 24                                                                                                                        |
| Sarcoplasmic/endoplasmic reticulum calcium ATPase 1 | r = 0.9427, p < 0.0001, n = 17                                                                                                                       | r = 0.9428, p < 0.0001, n = 16                                                                                                                       | r = 0.8179, p < 0.0005, n = 17                                                                                                                       | r = 0.9168, p < 0.0001, n = 17                                                                                                                       |
| Triosephosphate isomerase                           | r = 0.9928, p < 0.0001, n = 24                                                                                                                       | r = 0.9843, p < 0.0001, n = 22                                                                                                                       | r = 0.8382, p < 0.0001, n = 24                                                                                                                       | r = 0.9527, p < 0.0001, n = 24                                                                                                                       |
| Tropomyosin                                         | r = 0.9673, p < 0.0001, n = 24                                                                                                                       | r = 0.9563, p < 0.0001, n = 24                                                                                                                       | r = 0.8386, p < 0.0001, n = 24                                                                                                                       | r = 0.9372, p < 0.0001, n = 24                                                                                                                       |

Supplemental Table 3A: Human Muscle FSR. Values represent mean, SD for FSR of 273 proteins measured in the vastus lateralis muscle of 2-5 subjects who were sedentary and 2-6 subjects who underwent sprint interval training

| Protein                                                                           | Sedentary        | Sprint           | Sedentary      | Sprint         | Sedentary     | Sprint        |
|-----------------------------------------------------------------------------------|------------------|------------------|----------------|----------------|---------------|---------------|
|                                                                                   | FSR/week<br>Mean | FSR/week<br>Mean | FSR/week<br>SD | FSR/week<br>SD | FSR/week<br>N | FSR/week<br>N |
| Aspartate aminotransferase, cytoplasmic                                           | 7.2%             | 12.0%            | 0.8%           | 3.1%           | 5             | 6             |
| Heat shock 70 kDa protein 1A/1B                                                   | 13.2%            | 18.6%            | 2.7%           | 2.9%           | 5             | 6             |
| Fructose-1,6-bisphosphatase isozyme 2                                             | 12.9%            | 20.2%            | 1.9%           | 5.2%           | 5             | 5             |
| Phosphoglycerate mutase 2                                                         | 5.7%             | 8.5%             | 1.0%           | 1.8%           | 5             | 6             |
| Pyruvate kinase isozymes M1/M2                                                    | 9.5%             | 15.3%            | 1.6%           | 4.4%           | 5             | 6             |
| Malate dehydrogenase, cytoplasmic                                                 | 7.2%             | 11.5%            | 1.4%           | 3.3%           | 5             | 6             |
| Creatine kinase S-type, mitochondrial                                             | 9.0%             | 13.8%            | 2.2%           | 3.3%           | 5             | 6             |
| ATP synthase subunit beta, mitochondrial                                          | 8.5%             | 12.4%            | 1.8%           | 2.8%           | 5             | 6             |
| Fatty acid-binding protein, heart                                                 | 6.2%             | 9.3%             | 1.4%           | 2.3%           | 5             | 5             |
| Fructose-bisphosphate aldolase A                                                  | 10.5%            | 15.9%            | 1.7%           | 4.7%           | 5             | 6             |
| Triosephosphate isomerase                                                         | 5.4%             | 8.3%             | 0.9%           | 2.5%           | 5             | 6             |
| ATP synthase subunit alpha, mitochondrial                                         | 9.3%             | 13.4%            | 1.8%           | 3.5%           | 5             | 6             |
| 2-oxoglutarate dehydrogenase, mitochondrial                                       | 15.5%            | 25.4%            | 2.6%           | 10.5%          | 5             | 6             |
| Phosphoglycerate kinase 1                                                         | 5.7%             | 8.6%             | 1.0%           | 2.6%           | 5             | 6             |
| L-lactate dehydrogenase A chain                                                   | 7.6%             | 13.1%            | 1.6%           | 5.4%           | 5             | 6             |
| Ferritin heavy chain                                                              | 17.9%            | 33.6%            | 3.1%           | 10.8%          | 3             | 3             |
| Filamin-A                                                                         | 17.7%            | 25.7%            | 2.6%           | 7.9%           | 5             | 5             |
| Glyceraldehyde-3-phosphate dehydrogenase                                          | 7.0%             | 11.5%            | 0.4%           | 4.6%           | 5             | 6             |
| Myosin light chain 1/3, skeletal muscle isoform                                   | 10.0%            | 12.9%            | 2.7%           | 1.6%           | 5             | 6             |
| Filamin-C                                                                         | 16.1%            | 25.3%            | 1.7%           | 10.3%          | 5             | 6             |
| Fumarate hydratase, mitochondrial                                                 | 9.7%             | 15.7%            | 1.7%           | 6.1%           | 5             | 6             |
| Glucose-6-phosphate isomerase                                                     | 6.3%             | 9.0%             | 0.7%           | 2.9%           | 5             | 6             |
| Phosphoglycerate mutase 1                                                         | 6.3%             | 9.0%             | 0.7%           | 2.8%           | 5             | 6             |
| Aldose reductase                                                                  | 5.2%             | 7.4%             | 0.6%           | 2.2%           | 5             | 5             |
| 14-3-3 protein gamma                                                              | 17.6%            | 32.3%            | 4.6%           | 16.5%          | 5             | 6             |
| Beta-enolase                                                                      | 6.3%             | 8.8%             | 0.8%           | 2.6%           | 5             | 6             |
| 60 kDa heat shock protein, mitochondrial                                          | 9.3%             | 13.6%            | 1.5%           | 4.3%           | 5             | 5             |
| Tropomyosin alpha-1 chain                                                         | 7.6%             | 10.3%            | 0.8%           | 2.9%           | 5             | 6             |
| Filamin-B                                                                         | 17.4%            | 25.3%            | 2.2%           | 9.5%           | 5             | 5             |
| Apolipoprotein A-I                                                                | 72.6%            | 74.9%            | 4.6%           | 0.0%           | 4             | 4             |
| Histidine triad nucleotide-binding protein 1                                      | 7.5%             | 6.1%             | 0.3%           | 0.5%           | 2             | 2             |
| Ubiquitin-like modifier-activating enzyme 1                                       | 16.5%            | 21.3%            | 1.2%           | 5.8%           | 5             | 6             |
| Superoxide dismutase [Cu-Zn]                                                      | 5.5%             | 12.4%            | 1.0%           | 8.5%           | 5             | 4             |
| LIM domain-binding protein 3                                                      | 19.7%            | 12.7%            | 4.3%           | 0.9%           | 3             | 2             |
| Aspartate aminotransferase, mitochondrial                                         | 7.4%             | 10.2%            | 2.2%           | 2.6%           | 5             | 6             |
| ADP/ATP translocase 1                                                             | 10.4%            | 14.3%            | 2.4%           | 4.0%           | 5             | 6             |
| Electron transfer flavoprotein subunit beta                                       | 8.8%             | 13.6%            | 3.2%           | 2.9%           | 4             | 3             |
| Flavin reductase (NADPH)                                                          | 8.7%             | 10.8%            | 1.1%           | 2.4%           | 5             | 6             |
| Tubulin beta-4A chain                                                             | 8.8%             | 10.8%            | 1.6%           | 0.5%           | 4             | 3             |
| Nucleoside diphosphate kinase A                                                   | 6.5%             | 9.5%             | 2.4%           | 2.5%           | 5             | 4             |
| ATP synthase subunit O, mitochondrial                                             | 5.9%             | 9.6%             | 2.1%           | 0.5%           | 3             | 2             |
| Myosin-7                                                                          | 10.8%            | 22.1%            | 1.6%           | 18.4%          | 5             | 6             |
| Adenylate kinase isoenzyme 1                                                      | 4.7%             | 5.8%             | 0.5%           | 1.3%           | 5             | 5             |
| Myosin-6                                                                          | 11.2%            | 22.4%            | 1.7%           | 18.3%          | 5             | 6             |
| Gamma-enolase                                                                     | 5.0%             | 6.8%             | 0.8%           | 2.3%           | 5             | 6             |
| Nucleoside diphosphate kinase B                                                   | 7.1%             | 9.6%             | 2.1%           | 2.5%           | 5             | 5             |
| Cofilin-1                                                                         | 10.6%            | 13.5%            | 1.7%           | 3.4%           | 5             | 5             |
| 1,4-alpha-glucan-branching enzyme                                                 | 20.8%            | 27.1%            | 0.8%           | 5.8%           | 3             | 3             |
| Myosin-2                                                                          | 11.2%            | 18.3%            | 1.0%           | 10.1%          | 5             | 5             |
| Alpha-enolase                                                                     | 5.2%             | 6.9%             | 0.8%           | 2.2%           | 5             | 6             |
| Alpha-actinin-3                                                                   | 6.7%             | 4.6%             | 1.3%           | 0.9%           | 3             | 2             |
| NADP-dependent malic enzyme                                                       | 17.3%            | 7.0%             | 7.0%           | 1.4%           | 2             | 2             |
| Phosphatidylethanolamine-binding protein 1                                        | 6.5%             | 7.7%             | 1.5%           | 1.1%           | 5             | 6             |
| UTP--glucose-1-phosphate uridylyltransferase                                      | 15.8%            | 19.0%            | 2.1%           | 3.9%           | 5             | 5             |
| Phosphoglucomutase-1                                                              | 7.7%             | 10.5%            | 0.4%           | 4.1%           | 5             | 6             |
| Heat shock protein beta-6                                                         | 21.7%            | 30.3%            | 4.9%           | 12.2%          | 5             | 6             |
| ES1 protein homolog, mitochondrial                                                | 8.2%             | 11.4%            | 2.3%           | 3.2%           | 5             | 3             |
| Heat shock cognate 71 kDa protein                                                 | 14.1%            | 17.4%            | 1.0%           | 4.8%           | 5             | 5             |
| Creatine kinase B-type                                                            | 7.9%             | 14.6%            | 4.8%           | 3.9%           | 3             | 3             |
| Troponin I, fast skeletal muscle                                                  | 11.1%            | 15.9%            | 1.6%           | 6.9%           | 5             | 6             |
| Peroxisredoxin-6                                                                  | 9.1%             | 10.7%            | 1.5%           | 1.8%           | 5             | 6             |
| Protein disulfide-isomerase                                                       | 20.6%            | 14.8%            | 2.2%           | 2.9%           | 2             | 2             |
| Heat shock-related 70 kDa protein 2                                               | 15.5%            | 19.6%            | 1.6%           | 6.1%           | 5             | 5             |
| Enoyl-CoA delta isomerase 1, mitochondrial                                        | 14.8%            | 9.2%             | 5.0%           | 3.3%           | 3             | 3             |
| Alpha-1-antitrypsin                                                               | 60.4%            | 41.4%            | 21.0%          | 34.9%          | 5             | 5             |
| Myomesin-2                                                                        | 5.3%             | 6.9%             | 0.3%           | 2.3%           | 5             | 6             |
| Sarcoplasmic/endoplasmic reticulum calcium ATPase 1                               | 12.3%            | 15.7%            | 1.2%           | 4.9%           | 5             | 6             |
| Four and a half LIM domains protein 1                                             | 9.4%             | 13.1%            | 0.8%           | 5.5%           | 5             | 6             |
| Cofilin-2                                                                         | 10.6%            | 13.2%            | 1.4%           | 3.7%           | 5             | 5             |
| Elongation factor 1-alpha 2                                                       | 14.7%            | 18.5%            | 1.2%           | 5.8%           | 5             | 5             |
| Isopentenyl-diphosphate Delta-isomerase 2                                         | 25.5%            | 13.4%            | 9.8%           | 0.6%           | 2             | 2             |
| Glutathione S-transferase P                                                       | 7.5%             | 9.1%             | 1.3%           | 2.2%           | 5             | 5             |
| Myosin-4                                                                          | 11.6%            | 18.1%            | 1.7%           | 9.7%           | 5             | 5             |
| Peroxisredoxin-1                                                                  | 11.8%            | 14.2%            | 2.0%           | 3.3%           | 5             | 5             |
| Ubiquinone biosynthesis protein COQ9, mitochondrial                               | 7.3%             | 9.1%             | 1.6%           | 2.4%           | 5             | 5             |
| Tripartite motif-containing protein 72                                            | 10.4%            | 12.3%            | 2.4%           | 1.8%           | 5             | 5             |
| Lumican                                                                           | 18.7%            | 11.7%            | 9.0%           | 3.1%           | 3             | 4             |
| Dihydrolipoyllysine-residue acetyltransferase component of pyruvate dehydrogenase | 3.8%             | 5.6%             | 1.0%           | 2.2%           | 4             | 3             |
| L-lactate dehydrogenase B chain                                                   | 8.9%             | 11.9%            | 0.4%           | 4.9%           | 5             | 6             |
| Glycogen debranching enzyme                                                       | 9.9%             | 13.2%            | 1.8%           | 5.3%           | 5             | 6             |

|                                                                                   |       |       |       |       |   |   |
|-----------------------------------------------------------------------------------|-------|-------|-------|-------|---|---|
| Creatine kinase M-type                                                            | 6.2%  | 8.0%  | 0.8%  | 2.9%  | 5 | 6 |
| Troponin T, slow skeletal muscle                                                  | 13.9% | 18.9% | 1.8%  | 6.0%  | 3 | 3 |
| Medium-chain specific acyl-CoA dehydrogenase, mitochondrial                       | 21.2% | 25.1% | 5.3%  | 4.2%  | 5 | 4 |
| Fatty acid-binding protein, adipocyte                                             | 19.7% | 35.7% | 7.9%  | 16.1% | 3 | 2 |
| Vinculin                                                                          | 16.7% | 21.2% | 4.2%  | 6.3%  | 5 | 5 |
| Carbonic anhydrase 3                                                              | 4.3%  | 6.1%  | 0.8%  | 2.8%  | 5 | 6 |
| Long-chain-fatty-acid--CoA ligase 1                                               | 12.2% | 16.7% | 6.2%  | 3.7%  | 5 | 4 |
| Kelch repeat and BTB domain-containing protein 10                                 | 24.5% | 20.1% | 0.6%  | 3.3%  | 2 | 2 |
| Troponin C, slow skeletal and cardiac muscles                                     | 18.9% | 29.3% | 3.0%  | 16.8% | 5 | 4 |
| Myosin-binding protein C, fast-type                                               | 20.8% | 26.7% | 2.2%  | 7.0%  | 3 | 2 |
| Pyruvate dehydrogenase E1 component subunit beta, mitochondrial                   | 7.4%  | 9.9%  | 3.0%  | 3.4%  | 5 | 6 |
| Aldehyde dehydrogenase X, mitochondrial                                           | 15.9% | 22.2% | 2.9%  | 4.8%  | 2 | 2 |
| Malate dehydrogenase, mitochondrial                                               | 7.6%  | 9.6%  | 1.6%  | 3.4%  | 5 | 6 |
| Cytosolic 10-formyltetrahydrofolate dehydrogenase                                 | 18.5% | 23.5% | 3.8%  | 7.5%  | 5 | 3 |
| Protein DJ-1                                                                      | 6.9%  | 8.1%  | 1.2%  | 1.8%  | 5 | 6 |
| Band 3 anion transport protein                                                    | 6.4%  | 4.2%  | 2.8%  | 0.2%  | 4 | 3 |
| Beta-actin-like protein 2                                                         | 5.1%  | 6.4%  | 0.7%  | 2.2%  | 5 | 6 |
| Tubulin beta chain                                                                | 9.2%  | 11.5% | 2.1%  | 3.2%  | 5 | 3 |
| Carbonic anhydrase 1                                                              | 7.2%  | 8.8%  | 2.4%  | 2.2%  | 5 | 6 |
| Reticulon-2                                                                       | 11.6% | 10.6% | 1.0%  | 0.3%  | 3 | 2 |
| Tropomyosin alpha-3 chain                                                         | 8.7%  | 10.1% | 0.6%  | 2.5%  | 5 | 6 |
| Ig gamma-2 chain C region                                                         | 12.0% | 7.3%  | 5.8%  | 5.2%  | 5 | 3 |
| Actin, alpha cardiac muscle 1                                                     | 4.5%  | 5.4%  | 0.3%  | 1.7%  | 5 | 6 |
| Cysteine and glycine-rich protein 3                                               | 19.6% | 7.8%  | 0.4%  | 9.7%  | 2 | 2 |
| NADH dehydrogenase [ubiquinone] 1 alpha subcomplex subunit 11                     | 10.3% | 8.9%  | 1.0%  | 1.3%  | 3 | 2 |
| Glutathione S-transferase Mu 1                                                    | 5.6%  | 8.4%  | 0.8%  | 2.9%  | 2 | 4 |
| Alpha-actinin-4                                                                   | 9.1%  | 41.9% | 2.8%  | 46.6% | 3 | 2 |
| Enoyl-CoA hydratase, mitochondrial                                                | 9.2%  | 11.3% | 1.9%  | 3.5%  | 5 | 5 |
| Transforming protein RhoA                                                         | 27.9% | 53.7% | 11.4% | 24.4% | 2 | 2 |
| Tubulin beta-4B chain                                                             | 9.5%  | 11.8% | 2.5%  | 2.9%  | 5 | 3 |
| Peroxiredoxin-2                                                                   | 8.0%  | 9.4%  | 2.9%  | 1.6%  | 5 | 6 |
| Tubulin alpha-4A chain                                                            | 17.7% | 20.1% | 3.6%  | 1.6%  | 5 | 3 |
| Retinal dehydrogenase 1                                                           | 13.6% | 11.4% | 1.8%  | 3.5%  | 4 | 3 |
| Superoxide dismutase [Mn], mitochondrial                                          | 7.7%  | 9.9%  | 1.5%  | 4.2%  | 5 | 6 |
| Ig alpha-1 chain C region                                                         | 57.8% | 46.1% | 18.2% | 16.2% | 3 | 4 |
| Myoglobin                                                                         | 3.6%  | 4.3%  | 0.5%  | 1.3%  | 5 | 6 |
| Delta-1-pyrroline-5-carboxylate dehydrogenase, mitochondrial                      | 11.5% | 8.2%  | 3.8%  | 0.5%  | 3 | 2 |
| Cytoplasmic aconitate hydratase                                                   | 14.5% | 17.5% | 4.4%  | 4.7%  | 5 | 4 |
| Hydroxyacyl-coenzyme A dehydrogenase, mitochondrial                               | 7.7%  | 9.5%  | 2.1%  | 3.4%  | 5 | 6 |
| Myosin regulatory light chain 2, ventricular/cardiac muscle isoform               | 8.1%  | 9.5%  | 1.4%  | 2.5%  | 5 | 6 |
| Serum albumin                                                                     | 22.9% | 28.3% | 8.4%  | 11.0% | 5 | 6 |
| Ig kappa chain C region                                                           | 16.8% | 26.0% | 5.5%  | 16.4% | 4 | 6 |
| Protein-arginine deiminase type-2                                                 | 14.4% | 8.3%  | 8.0%  | 0.9%  | 3 | 2 |
| NAD(P) transhydrogenase, mitochondrial                                            | 8.9%  | 21.9% | 1.9%  | 25.4% | 3 | 5 |
| Ig gamma-1 chain C region                                                         | 15.9% | 19.5% | 3.7%  | 7.2%  | 5 | 5 |
| Actin, alpha skeletal muscle                                                      | 4.4%  | 5.2%  | 0.3%  | 1.7%  | 5 | 6 |
| Serine/threonine-protein phosphatase 2A 65 kDa regulatory subunit A alpha isoform | 25.1% | 32.4% | 5.8%  | 9.2%  | 3 | 2 |
| Alpha-crystallin B chain                                                          | 18.6% | 22.3% | 4.6%  | 7.0%  | 5 | 6 |
| Citrate synthase, mitochondrial                                                   | 8.9%  | 11.0% | 3.5%  | 3.4%  | 5 | 5 |
| Dysferlin                                                                         | 9.8%  | 10.8% | 0.0%  | 1.8%  | 3 | 2 |
| Alpha-actinin-1                                                                   | 7.7%  | 10.1% | 1.9%  | 3.6%  | 3 | 3 |
| ATP synthase subunit b, mitochondrial                                             | 6.8%  | 8.6%  | 1.7%  | 3.1%  | 5 | 3 |
| Myosin regulatory light chain 2, skeletal muscle isoform                          | 6.9%  | 8.5%  | 2.1%  | 3.1%  | 5 | 6 |
| Glutathione S-transferase Mu 4                                                    | 6.0%  | 8.3%  | 0.3%  | 3.0%  | 2 | 4 |
| WD repeat-containing protein 1                                                    | 5.8%  | 7.3%  | 0.3%  | 1.8%  | 2 | 2 |
| POTE ankyrin domain family member E                                               | 4.5%  | 5.4%  | 0.5%  | 2.0%  | 5 | 6 |
| Annexin A6                                                                        | 16.3% | 12.5% | 0.3%  | 8.5%  | 3 | 4 |
| Polyubiquitin-C                                                                   | 52.5% | 67.6% | 16.5% | 12.6% | 5 | 3 |
| Myosin-1                                                                          | 11.4% | 13.7% | 1.3%  | 4.8%  | 5 | 4 |
| Synaptophysin-like protein 2                                                      | 2.2%  | 3.1%  | 0.9%  | 1.4%  | 4 | 2 |
| Isoleucine--tRNA ligase, mitochondrial                                            | 15.0% | 12.5% | 3.4%  | 0.9%  | 3 | 2 |
| Calsequestrin-1                                                                   | 10.0% | 5.3%  | 11.2% | 1.3%  | 4 | 5 |
| Tubulin alpha-8 chain                                                             | 17.4% | 20.0% | 4.8%  | 2.2%  | 4 | 3 |
| Neutral alpha-glucosidase AB                                                      | 23.2% | 16.2% | 3.1%  | 9.2%  | 2 | 2 |
| Trifunctional enzyme subunit alpha, mitochondrial                                 | 7.0%  | 6.1%  | 1.9%  | 0.5%  | 5 | 4 |
| Cytochrome b-c1 complex subunit 1, mitochondrial                                  | 9.6%  | 12.4% | 1.6%  | 5.0%  | 3 | 2 |
| ATP synthase subunit d, mitochondrial                                             | 7.0%  | 9.2%  | 1.7%  | 3.7%  | 3 | 3 |
| Electron transfer flavoprotein subunit alpha, mitochondrial                       | 9.9%  | 11.8% | 2.5%  | 4.5%  | 5 | 6 |
| NADH dehydrogenase [ubiquinone] iron-sulfur protein 3, mitochondrial              | 16.3% | 22.1% | 5.0%  | 8.8%  | 3 | 2 |
| Delta(3,5)-Delta(2,4)-dienoyl-CoA isomerase, mitochondrial                        | 16.6% | 19.4% | 4.3%  | 4.9%  | 5 | 3 |
| Inter-alpha-trypsin inhibitor heavy chain H2                                      | 68.2% | 74.9% | 9.5%  | 0.0%  | 2 | 2 |
| Protein NDRG2                                                                     | 36.1% | 32.1% | 6.5%  | 19.4% | 5 | 3 |
| Troponin T, fast skeletal muscle                                                  | 11.8% | 10.3% | 1.4%  | 3.0%  | 3 | 3 |
| Thioredoxin-dependent peroxide reductase, mitochondrial                           | 11.8% | 14.6% | 4.2%  | 6.1%  | 5 | 5 |
| Glutathione S-transferase Mu 3                                                    | 9.4%  | 8.7%  | 0.7%  | 1.3%  | 3 | 2 |
| Acylphosphatase-2                                                                 | 15.4% | 12.3% | 5.3%  | 2.5%  | 4 | 2 |
| Glycogen [starch] synthase, muscle                                                | 15.8% | 17.3% | 4.3%  | 1.9%  | 5 | 4 |
| Pyruvate dehydrogenase E1 component subunit alpha, somatic form, mitochondrial    | 8.1%  | 9.1%  | 1.6%  | 0.4%  | 3 | 2 |
| Cytochrome b-c1 complex subunit 2, mitochondrial                                  | 8.4%  | 9.4%  | 1.0%  | 1.8%  | 3 | 2 |
| Galectin-1                                                                        | 8.5%  | 10.4% | 1.9%  | 3.5%  | 3 | 2 |
| ATP synthase subunit g, mitochondrial                                             | 5.6%  | 6.8%  | 1.2%  | 2.5%  | 3 | 2 |
| Ig gamma-4 chain C region                                                         | 11.2% | 16.4% | 0.6%  | 11.0% | 3 | 2 |
| Vitamin D-binding protein                                                         | 74.9% | 74.9% | 0.0%  | 0.0%  | 2 | 2 |
| PWWP domain-containing protein MUM1                                               | 5.8%  | 8.6%  | 0.6%  | 4.6%  | 2 | 4 |
| Cytochrome b-c1 complex subunit 7                                                 | 11.7% | 14.8% | 0.4%  | 5.3%  | 2 | 2 |
| Heat shock protein beta-1                                                         | 15.3% | 19.1% | 3.9%  | 9.8%  | 5 | 5 |
| Importin subunit beta-1                                                           | 26.7% | 18.3% | 0.1%  | 17.6% | 2 | 2 |
| Cullin-associated NEDD8-dissociated protein 2                                     | 33.7% | 40.7% | 13.4% | 16.1% | 4 | 3 |
| Annexin A5                                                                        | 15.0% | 16.5% | 1.8%  | 3.4%  | 4 | 3 |

|                                                                          |       |       |       |       |   |   |
|--------------------------------------------------------------------------|-------|-------|-------|-------|---|---|
| Cytochrome c oxidase subunit 5B, mitochondrial                           | 9.8%  | 8.0%  | 3.2%  | 0.9%  | 3 | 2 |
| Angiotensinogen                                                          | 35.3% | 51.0% | 34.4% | 33.8% | 3 | 2 |
| Very long-chain specific acyl-CoA dehydrogenase, mitochondrial           | 16.6% | 19.2% | 3.3%  | 6.7%  | 5 | 2 |
| Protein-L-isoaspartate(D-aspartate) O-methyltransferase                  | 10.3% | 7.1%  | 6.1%  | 1.1%  | 3 | 2 |
| Myosin light chain 3                                                     | 4.1%  | 4.6%  | 1.1%  | 1.4%  | 5 | 6 |
| Mitochondrial 2-oxoglutarate/malate carrier protein                      | 8.7%  | 9.9%  | 1.5%  | 2.5%  | 3 | 2 |
| Hemoglobin subunit alpha                                                 | 7.4%  | 6.7%  | 2.3%  | 1.6%  | 5 | 6 |
| Ubiquitin carboxyl-terminal hydrolase 5                                  | 16.7% | 14.9% | 3.2%  | 1.2%  | 2 | 2 |
| Carbonic anhydrase 2                                                     | 5.9%  | 6.5%  | 1.4%  | 1.6%  | 5 | 5 |
| Apolipoprotein B-100                                                     | 48.2% | 64.9% | 37.8% | 17.3% | 2 | 3 |
| Prohibitin-2                                                             | 4.6%  | 6.4%  | 1.5%  | 4.4%  | 3 | 2 |
| Actin, cytoplasmic 2                                                     | 4.6%  | 5.2%  | 0.5%  | 2.1%  | 5 | 6 |
| Protein S100-A1                                                          | 18.1% | 20.6% | 6.0%  | 5.6%  | 4 | 3 |
| Catalase                                                                 | 9.2%  | 11.0% | 2.9%  | 5.0%  | 4 | 5 |
| Microsomal glutathione S-transferase 3                                   | 12.7% | 15.3% | 3.1%  | 5.9%  | 3 | 2 |
| Glycerol-3-phosphate dehydrogenase [NAD+], cytoplasmic                   | 12.8% | 14.3% | 1.9%  | 5.0%  | 5 | 5 |
| SH3 domain-binding glutamic acid-rich protein                            | 18.8% | 22.0% | 2.5%  | 8.4%  | 4 | 4 |
| Mitochondrial inner membrane protein                                     | 8.8%  | 6.9%  | 1.7%  | 7.1%  | 3 | 2 |
| Glycogen phosphorylase, brain form                                       | 9.3%  | 8.4%  | 2.3%  | 3.7%  | 5 | 6 |
| Spectrin alpha chain, erythrocyte                                        | 10.8% | 8.4%  | 4.9%  | 1.5%  | 2 | 2 |
| Acyl-CoA-binding protein                                                 | 5.0%  | 6.0%  | 0.3%  | 2.2%  | 2 | 2 |
| Rab GDP dissociation inhibitor beta                                      | 10.7% | 11.4% | 1.5%  | 0.8%  | 3 | 2 |
| NADH-ubiquinone oxidoreductase 75 kDa subunit, mitochondrial             | 20.2% | 24.4% | 6.2%  | 9.7%  | 3 | 2 |
| Acetyl-CoA acetyltransferase, mitochondrial                              | 8.2%  | 9.9%  | 2.1%  | 6.1%  | 5 | 6 |
| Sarcoplasmic/endoplasmic reticulum calcium ATPase 2                      | 12.8% | 14.1% | 1.9%  | 4.3%  | 5 | 6 |
| UPF0366 protein C11orf67                                                 | 9.7%  | 10.7% | 3.6%  | 0.4%  | 2 | 3 |
| Ryanodine receptor 1                                                     | 16.3% | 11.9% | 11.7% | 9.1%  | 5 | 4 |
| Alpha-2-macroglobulin                                                    | 39.1% | 45.8% | 20.9% | 16.0% | 5 | 5 |
| Heat shock protein HSP 90-beta                                           | 57.2% | 56.4% | 21.5% | 26.1% | 5 | 2 |
| Glycogen phosphorylase, muscle form                                      | 10.0% | 11.3% | 2.2%  | 5.0%  | 5 | 6 |
| Protein-cysteine N-palmitoyltransferase HHAT-like protein                | 3.7%  | 4.5%  | 0.9%  | 2.7%  | 3 | 2 |
| GTP-binding protein SAR1b                                                | 48.8% | 41.8% | 13.3% | 16.3% | 2 | 2 |
| S-formylglutathione hydrolase                                            | 5.4%  | 6.4%  | 2.9%  | 0.1%  | 4 | 2 |
| Leucine-rich PPR motif-containing protein, mitochondrial                 | 38.7% | 43.2% | 17.5% | 8.0%  | 3 | 2 |
| NADH dehydrogenase [ubiquinone] 1 alpha subcomplex subunit 5             | 15.4% | 18.0% | 5.6%  | 6.0%  | 3 | 2 |
| DNA damage-binding protein 1                                             | 33.3% | 30.1% | 10.0% | 10.6% | 5 | 5 |
| Cytochrome b-c1 complex subunit Rieske, mitochondrial                    | 10.5% | 12.0% | 2.3%  | 4.3%  | 3 | 2 |
| Dihydropyridol dehydrogenase, mitochondrial                              | 10.6% | 13.1% | 2.5%  | 8.9%  | 5 | 5 |
| Ig lambda-2 chain C regions                                              | 21.4% | 23.2% | 9.9%  | 0.6%  | 4 | 2 |
| Hemopexin                                                                | 46.7% | 56.5% | 19.0% | 26.0% | 2 | 2 |
| Transitional endoplasmic reticulum ATPase                                | 36.5% | 30.7% | 13.7% | 6.5%  | 3 | 2 |
| Phosphorylase b kinase regulatory subunit beta                           | 14.1% | 15.4% | 4.2%  | 1.8%  | 3 | 2 |
| CDGSH iron-sulfur domain-containing protein 1                            | 9.9%  | 12.1% | 2.9%  | 5.3%  | 2 | 2 |
| Hexokinase-1                                                             | 20.9% | 16.8% | 10.5% | 2.2%  | 3 | 2 |
| Troponin C, skeletal muscle                                              | 21.1% | 20.2% | 3.2%  | 6.1%  | 4 | 5 |
| PDZ and LIM domain protein 3                                             | 25.7% | 29.9% | 5.1%  | 12.2% | 3 | 3 |
| Alpha-actinin-2                                                          | 7.0%  | 8.3%  | 2.3%  | 5.1%  | 4 | 3 |
| Aldehyde dehydrogenase, mitochondrial                                    | 31.7% | 28.2% | 9.8%  | 3.9%  | 3 | 3 |
| Aconitate hydratase, mitochondrial                                       | 11.3% | 13.3% | 2.0%  | 7.0%  | 5 | 6 |
| Peptidyl-prolyl cis-trans isomerase A                                    | 13.0% | 14.6% | 1.0%  | 4.7%  | 2 | 3 |
| Cytochrome c oxidase subunit 4 isoform 1, mitochondrial                  | 9.7%  | 10.6% | 3.2%  | 1.5%  | 3 | 2 |
| Myosin-binding protein C, slow-type                                      | 18.2% | 19.7% | 4.4%  | 6.1%  | 5 | 5 |
| Glutathione S-transferase omega-1                                        | 7.3%  | 7.7%  | 0.7%  | 1.1%  | 2 | 2 |
| Heat shock protein HSP 90-alpha                                          | 53.0% | 41.8% | 16.0% | 28.7% | 4 | 3 |
| Glutathione S-transferase Mu 2                                           | 7.5%  | 7.2%  | 1.3%  | 2.3%  | 5 | 5 |
| Myc box-dependent-interacting protein 1                                  | 17.0% | 18.9% | 2.2%  | 6.1%  | 2 | 2 |
| Serotransferrin                                                          | 51.2% | 52.0% | 17.9% | 20.8% | 5 | 5 |
| Myosin-8                                                                 | 11.9% | 12.7% | 2.0%  | 4.3%  | 5 | 4 |
| Titin                                                                    | 17.4% | 17.0% | 2.2%  | 6.4%  | 4 | 5 |
| Ig gamma-3 chain C region                                                | 17.4% | 18.5% | 6.6%  | 5.7%  | 4 | 3 |
| 14-3-3 protein epsilon                                                   | 13.6% | 14.3% | 2.6%  | 3.8%  | 5 | 5 |
| Plectin                                                                  | 15.1% | 16.5% | 2.8%  | 7.3%  | 5 | 3 |
| Leucine-rich repeat-containing protein 20                                | 16.9% | 15.8% | 4.5%  | 0.8%  | 5 | 2 |
| Hemoglobin subunit beta                                                  | 7.4%  | 7.0%  | 2.6%  | 1.7%  | 5 | 6 |
| L-xylulose reductase                                                     | 8.2%  | 8.8%  | 0.2%  | 2.7%  | 2 | 2 |
| Translationally-controlled tumor protein                                 | 62.4% | 63.3% | 21.7% | 20.1% | 3 | 3 |
| Prolyl endopeptidase                                                     | 12.4% | 13.6% | 3.2%  | 6.4%  | 3 | 2 |
| Programmed cell death 6-interacting protein                              | 28.1% | 38.4% | 3.7%  | 27.2% | 2 | 2 |
| Clathrin heavy chain 1                                                   | 39.6% | 40.0% | 14.1% | 9.4%  | 4 | 2 |
| Voltage-dependent anion-selective channel protein 1                      | 11.8% | 12.7% | 4.9%  | 4.3%  | 3 | 2 |
| Ankyrin repeat domain-containing protein 2                               | 18.6% | 32.1% | 4.7%  | 37.2% | 5 | 3 |
| Succinyl-CoA ligase [ADP-forming] subunit beta, mitochondrial            | 19.8% | 16.9% | 11.2% | 4.8%  | 3 | 2 |
| Carboxymethylenebutenolidase homolog                                     | 7.5%  | 7.2%  | 2.5%  | 4.7%  | 4 | 5 |
| Atrial natriuretic peptide receptor 1                                    | 4.4%  | 5.1%  | 2.6%  | 4.6%  | 4 | 5 |
| ATP synthase subunit f, mitochondrial                                    | 9.4%  | 8.6%  | 4.5%  | 2.4%  | 2 | 2 |
| Troponin I, slow skeletal muscle                                         | 21.0% | 21.2% | 6.6%  | 4.6%  | 5 | 6 |
| Isocitrate dehydrogenase [NADP], mitochondrial                           | 8.4%  | 8.5%  | 2.3%  | 2.1%  | 5 | 5 |
| Importin-5                                                               | 48.9% | 43.1% | 21.9% | 9.5%  | 2 | 2 |
| Phosphorylase b kinase regulatory subunit alpha, skeletal muscle isoform | 12.3% | 12.9% | 1.0%  | 4.6%  | 5 | 5 |
| Sarcalumenin                                                             | 12.4% | 12.0% | 6.8%  | 6.7%  | 5 | 6 |
| Complement component 1 Q subcomponent-binding protein, mitochondrial     | 16.6% | 16.1% | 4.8%  | 6.9%  | 2 | 2 |
| Cytochrome c oxidase subunit 2                                           | 8.9%  | 9.3%  | 2.0%  | 3.5%  | 3 | 2 |
| Fructose-bisphosphate aldolase C                                         | 8.4%  | 8.8%  | 2.9%  | 4.4%  | 5 | 5 |
| Hemoglobin subunit delta                                                 | 7.1%  | 6.9%  | 2.8%  | 1.9%  | 5 | 6 |
| Isochorismatase domain-containing protein 2, mitochondrial               | 9.1%  | 9.7%  | 1.8%  | 6.2%  | 4 | 2 |
| Reticulon-4                                                              | 12.7% | 12.8% | 2.5%  | 1.3%  | 3 | 2 |
| Trifunctional enzyme subunit beta, mitochondrial                         | 16.7% | 17.2% | 2.4%  | 5.5%  | 3 | 2 |
| 14 kDa phosphohistidine phosphatase                                      | 6.3%  | 6.4%  | 0.5%  | 1.3%  | 2 | 2 |
| Complement C3                                                            | 70.3% | 62.6% | 9.2%  | 24.6% | 4 | 4 |

|                                                                          |       |       |       |       |   |   |
|--------------------------------------------------------------------------|-------|-------|-------|-------|---|---|
| Succinate dehydrogenase [ubiquinone] flavoprotein subunit, mitochondrial | 15.7% | 15.8% | 1.9%  | 0.9%  | 3 | 2 |
| Rab GDP dissociation inhibitor alpha                                     | 11.9% | 11.7% | 2.5%  | 1.2%  | 2 | 2 |
| Heat shock 70 kDa protein 4                                              | 30.4% | 28.3% | 14.6% | 5.3%  | 2 | 3 |
| Acyl-protein thioesterase 1                                              | 14.2% | 14.1% | 4.7%  | 6.6%  | 2 | 2 |
| Tropomyosin beta chain                                                   | 9.2%  | 9.4%  | 2.2%  | 3.4%  | 5 | 6 |
| Phosphate carrier protein, mitochondrial                                 | 8.9%  | 9.4%  | 2.8%  | 5.7%  | 3 | 3 |
| Myomesin-1                                                               | 10.3% | 10.9% | 1.3%  | 6.8%  | 5 | 4 |
| Succinate-semialdehyde dehydrogenase, mitochondrial                      | 6.1%  | 6.0%  | 2.5%  | 1.7%  | 3 | 2 |
| Stress-70 protein, mitochondrial                                         | 48.4% | 36.4% | 37.5% | 5.4%  | 2 | 2 |
| NADH dehydrogenase [ubiquinone] 1 beta subcomplex subunit 4              | 7.3%  | 7.5%  | 0.5%  | 4.8%  | 3 | 2 |
| ATP synthase subunit gamma, mitochondrial                                | 7.8%  | 7.8%  | 2.8%  | 3.8%  | 3 | 2 |
| Cytochrome c                                                             | 6.8%  | 7.4%  | 0.7%  | 6.9%  | 2 | 3 |
| Cullin-associated NEDD8-dissociated protein 1                            | 16.3% | 15.8% | 8.6%  | 4.5%  | 2 | 2 |
| 6-phosphofructokinase, muscle type                                       | 16.7% | 21.8% | 2.5%  | 19.5% | 5 | 6 |
| Profilin-1                                                               | 15.2% | 15.2% | 2.8%  | 2.6%  | 2 | 2 |

Supplemental Table 3B: Human Muscle FSR. Values represent mean, SD for FSR of proteins in the different gene ontological clusters, measured in the vastus lateralis muscle of 3-5 subjects who were sedentary and 4-6 subjects who underwent sprint interval training

| Proteins in Gene Ontology Term (Level 5)                                 | Sedentary FSR/week Mean | Sprint FSR/week Mean | Sedentary FSR/week SD | Sprint FSR/week SD | Sedentary FSR/week N | Sprint FSR/week N |
|--------------------------------------------------------------------------|-------------------------|----------------------|-----------------------|--------------------|----------------------|-------------------|
| <b>Glucose Metabolic Process GO:0006006</b>                              |                         |                      |                       |                    |                      |                   |
| 2-oxoglutarate dehydrogenase, mitochondrial                              | 15.5%                   | 25.4%                | 2.6%                  | 10.5%              | 5                    | 6                 |
| 6-phosphofructokinase, muscle type                                       | 16.7%                   | 21.8%                | 2.5%                  | 19.5%              | 5                    | 6                 |
| Alpha-crystallin B chain                                                 | 18.6%                   | 22.3%                | 4.6%                  | 7.0%               | 5                    | 6                 |
| Alpha-enolase                                                            | 5.2%                    | 6.9%                 | 0.8%                  | 2.2%               | 5                    | 6                 |
| Beta-enolase                                                             | 6.3%                    | 8.8%                 | 0.8%                  | 2.6%               | 5                    | 6                 |
| Fructose-1,6-bisphosphatase isozyme 2                                    | 12.9%                   | 20.2%                | 1.9%                  | 5.2%               | 5                    | 5                 |
| Fructose-bisphosphate aldolase A                                         | 10.5%                   | 15.9%                | 1.7%                  | 4.7%               | 5                    | 6                 |
| Fructose-bisphosphate aldolase C                                         | 8.4%                    | 8.8%                 | 2.9%                  | 4.4%               | 5                    | 5                 |
| Gamma-enolase                                                            | 5.0%                    | 6.8%                 | 0.8%                  | 2.3%               | 5                    | 6                 |
| Glucose-6-phosphate isomerase                                            | 6.3%                    | 9.0%                 | 0.7%                  | 2.9%               | 5                    | 6                 |
| Glyceraldehyde-3-phosphate dehydrogenase                                 | 7.0%                    | 11.5%                | 0.4%                  | 4.6%               | 5                    | 6                 |
| Glycerol-3-phosphate dehydrogenase [NAD+], cytoplasmic                   | 12.8%                   | 14.3%                | 1.9%                  | 5.0%               | 5                    | 5                 |
| Glycogen [starch] synthase, muscle                                       | 15.8%                   | 17.3%                | 4.3%                  | 1.9%               | 5                    | 4                 |
| Glycogen debranching enzyme                                              | 9.9%                    | 13.2%                | 1.8%                  | 5.3%               | 5                    | 6                 |
| Glycogen phosphorylase, brain form                                       | 9.3%                    | 8.4%                 | 2.3%                  | 3.7%               | 5                    | 6                 |
| Glycogen phosphorylase, muscle form                                      | 10.0%                   | 11.3%                | 2.2%                  | 5.0%               | 5                    | 6                 |
| L-lactate dehydrogenase A chain                                          | 7.6%                    | 13.1%                | 1.6%                  | 5.4%               | 5                    | 6                 |
| L-lactate dehydrogenase B chain                                          | 8.9%                    | 11.9%                | 0.4%                  | 4.9%               | 5                    | 6                 |
| Malate dehydrogenase, cytoplasmic                                        | 7.2%                    | 11.5%                | 1.4%                  | 3.3%               | 5                    | 6                 |
| Malate dehydrogenase, mitochondrial                                      | 7.6%                    | 9.6%                 | 1.6%                  | 3.4%               | 5                    | 6                 |
| Phosphoglucosmutase-1                                                    | 7.7%                    | 10.5%                | 0.4%                  | 4.1%               | 5                    | 6                 |
| Phosphoglycerate kinase 1                                                | 5.7%                    | 8.6%                 | 1.0%                  | 2.6%               | 5                    | 6                 |
| Phosphoglycerate mutase 1                                                | 6.3%                    | 9.0%                 | 0.7%                  | 2.8%               | 5                    | 6                 |
| Phosphoglycerate mutase 2                                                | 5.7%                    | 8.5%                 | 1.0%                  | 1.8%               | 5                    | 6                 |
| Phosphorylase b kinase regulatory subunit alpha, skeletal muscle isoform | 12.3%                   | 12.9%                | 1.0%                  | 4.6%               | 5                    | 5                 |
| Pyruvate dehydrogenase E1 component subunit beta, mitochondrial          | 7.4%                    | 9.9%                 | 3.0%                  | 3.4%               | 5                    | 6                 |
| Pyruvate kinase isozymes M1/M2                                           | 9.5%                    | 15.3%                | 1.6%                  | 4.4%               | 5                    | 6                 |
| Triosephosphate isomerase                                                | 5.4%                    | 8.3%                 | 0.9%                  | 2.5%               | 5                    | 6                 |
| UTP--glucose-1-phosphate uridylyltransferase                             | 15.8%                   | 19.0%                | 2.1%                  | 3.9%               | 5                    | 5                 |
| <b>Striated Muscle Contraction GO:0006941</b>                            |                         |                      |                       |                    |                      |                   |
| Phosphoglycerate mutase 2                                                | 5.7%                    | 8.5%                 | 1.0%                  | 1.8%               | 5                    | 6                 |
| Fructose-bisphosphate aldolase A                                         | 10.5%                   | 15.9%                | 1.7%                  | 4.7%               | 5                    | 6                 |
| Myosin light chain 1/3, skeletal muscle isoform                          | 10.0%                   | 12.9%                | 2.7%                  | 1.6%               | 5                    | 6                 |
| Tropomyosin alpha-1 chain                                                | 7.6%                    | 10.3%                | 0.8%                  | 2.9%               | 5                    | 6                 |
| Myosin-2                                                                 | 11.2%                   | 18.3%                | 1.0%                  | 10.1%              | 5                    | 5                 |
| Troponin I, fast skeletal muscle                                         | 11.1%                   | 15.9%                | 1.6%                  | 6.9%               | 5                    | 6                 |
| Myosin-6                                                                 | 11.2%                   | 22.4%                | 1.7%                  | 18.3%              | 5                    | 6                 |
| Myosin-7                                                                 | 10.8%                   | 22.1%                | 1.6%                  | 18.4%              | 5                    | 6                 |
| Troponin C, slow skeletal and cardiac muscles                            | 18.9%                   | 29.3%                | 3.0%                  | 16.8%              | 5                    | 4                 |
| Actin, alpha cardiac muscle 1                                            | 4.5%                    | 5.4%                 | 0.3%                  | 1.7%               | 5                    | 6                 |
| Myoglobin                                                                | 3.6%                    | 4.3%                 | 0.5%                  | 1.3%               | 5                    | 6                 |
| Myosin-1                                                                 | 11.4%                   | 13.7%                | 1.3%                  | 4.8%               | 5                    | 4                 |
| Myosin light chain 3                                                     | 4.1%                    | 4.6%                 | 1.1%                  | 1.4%               | 5                    | 6                 |
| Troponin C, skeletal muscle                                              | 21.1%                   | 20.2%                | 3.2%                  | 6.1%               | 4                    | 5                 |
| Myomesin-1                                                               | 10.3%                   | 10.9%                | 1.3%                  | 6.8%               | 5                    | 4                 |
| Titin                                                                    | 17.4%                   | 17.0%                | 2.2%                  | 6.4%               | 4                    | 5                 |
| <b>Regulation of Apoptosis GO:0042981</b>                                |                         |                      |                       |                    |                      |                   |
| Heat shock 70 kDa protein 1A/1B                                          | 13.2%                   | 18.6%                | 2.7%                  | 2.9%               | 5                    | 6                 |
| 60 kDa heat shock protein, mitochondrial                                 | 9.3%                    | 13.6%                | 1.5%                  | 4.3%               | 5                    | 5                 |
| Superoxide dismutase [Cu-Zn]                                             | 5.5%                    | 12.4%                | 1.0%                  | 8.5%               | 5                    | 4                 |
| Nucleoside diphosphate kinase A                                          | 6.5%                    | 9.5%                 | 2.4%                  | 2.5%               | 5                    | 4                 |
| Nucleoside diphosphate kinase B                                          | 7.1%                    | 9.6%                 | 2.1%                  | 2.5%               | 5                    | 5                 |
| Cofilin-1                                                                | 10.6%                   | 13.5%                | 1.7%                  | 3.4%               | 5                    | 5                 |
| Glutathione S-transferase P                                              | 7.5%                    | 9.1%                 | 1.3%                  | 2.2%               | 5                    | 5                 |
| Elongation factor 1-alpha 2                                              | 14.7%                   | 18.5%                | 1.2%                  | 5.8%               | 5                    | 5                 |
| Peroxisredoxin-1                                                         | 11.8%                   | 14.2%                | 2.0%                  | 3.3%               | 5                    | 5                 |
| Superoxide dismutase [Mn], mitochondrial                                 | 7.7%                    | 9.9%                 | 1.5%                  | 4.2%               | 5                    | 6                 |
| Peroxisredoxin-2                                                         | 8.0%                    | 9.4%                 | 2.9%                  | 1.6%               | 5                    | 6                 |
| Alpha-crystallin B chain                                                 | 18.6%                   | 22.3%                | 4.6%                  | 7.0%               | 5                    | 6                 |
| Thioredoxin-dependent peroxide reductase, mitochondrial                  | 11.8%                   | 14.6%                | 4.2%                  | 6.1%               | 5                    | 5                 |
| Heat shock protein beta-1                                                | 15.3%                   | 19.1%                | 3.9%                  | 9.8%               | 5                    | 5                 |
| Catalase                                                                 | 9.2%                    | 11.0%                | 2.9%                  | 5.0%               | 4                    | 5                 |
| 14-3-3 protein epsilon                                                   | 13.6%                   | 14.3%                | 2.6%                  | 3.8%               | 5                    | 5                 |
| <b>Cellular Respiration GO:0045333</b>                                   |                         |                      |                       |                    |                      |                   |
| Malate dehydrogenase, cytoplasmic                                        | 7.2%                    | 11.5%                | 1.4%                  | 3.3%               | 5                    | 6                 |
| Fumarate hydratase, mitochondrial                                        | 9.7%                    | 15.7%                | 1.7%                  | 6.1%               | 5                    | 6                 |
| Pyruvate dehydrogenase E1 component subunit beta, mitochondrial          | 7.4%                    | 9.9%                 | 3.0%                  | 3.4%               | 5                    | 6                 |
| Malate dehydrogenase, mitochondrial                                      | 7.6%                    | 9.6%                 | 1.6%                  | 3.4%               | 5                    | 6                 |
| Superoxide dismutase [Mn], mitochondrial                                 | 7.7%                    | 9.9%                 | 1.5%                  | 4.2%               | 5                    | 6                 |
| Cytoplasmic aconitate hydratase                                          | 14.5%                   | 17.5%                | 4.4%                  | 4.7%               | 5                    | 4                 |
| Citrate synthase, mitochondrial                                          | 8.9%                    | 11.0%                | 3.5%                  | 3.4%               | 5                    | 5                 |
| NAD(P) transhydrogenase, mitochondrial                                   | 8.9%                    | 21.9%                | 1.9%                  | 25.4%              | 3                    | 5                 |
| Catalase                                                                 | 9.2%                    | 11.0%                | 2.9%                  | 5.0%               | 4                    | 5                 |
| Aconitate hydratase, mitochondrial                                       | 11.3%                   | 13.3%                | 2.0%                  | 7.0%               | 5                    | 6                 |
| Dihydropyridol dehydrogenase, mitochondrial                              | 10.6%                   | 13.1%                | 2.5%                  | 8.9%               | 5                    | 5                 |
| Isocitrate dehydrogenase [NADP], mitochondrial                           | 8.4%                    | 8.5%                 | 2.3%                  | 2.1%               | 5                    | 5                 |



Supplemental Table 4: Correlation of muscle and plasma creatine kinase M-type (CK-M) and carbonic anhydrase 3 (CA-3) with other muscle proteins in humans. Pearson correlation coefficients of muscle and plasma CK-M and CA-3 FSR with FSR of muscle proteins measured in human quadriceps of the same subject.

| Protein Name                                                             | Number of Subjects | Muscle CK-M FSR vs. Muscle Protein FSR |                | Plasma CK-M FSR vs. Muscle Protein FSR |                | Muscle CA-3 FSR vs. Muscle Protein FSR |                | Plasma CA-3 FSR vs. Muscle Protein FSR |                |
|--------------------------------------------------------------------------|--------------------|----------------------------------------|----------------|----------------------------------------|----------------|----------------------------------------|----------------|----------------------------------------|----------------|
|                                                                          |                    | Pearson Correlation Coefficient        | P (two-tailed) |
| <b>Myofibril</b>                                                         |                    |                                        |                |                                        |                |                                        |                |                                        |                |
| Actin, alpha cardiac muscle 1                                            | 17                 | 0.8738                                 | < 0.0001       | 0.7256                                 | 0.001          | 0.8156                                 | < 0.0001       | 0.7139                                 | 0.0013         |
| Actin, alpha skeletal muscle                                             | 17                 | 0.8985                                 | < 0.0001       | 0.7401                                 | 0.0007         | 0.8427                                 | < 0.0001       | 0.6932                                 | 0.002          |
| Filamin-B                                                                | 16                 | 0.9192                                 | < 0.0001       | 0.8618                                 | < 0.0001       | 0.8512                                 | < 0.0001       | 0.6753                                 | 0.0041         |
| Filamin-C                                                                | 17                 | 0.9413                                 | < 0.0001       | 0.9238                                 | < 0.0001       | 0.9048                                 | < 0.0001       | 0.7616                                 | 0.0004         |
| Myomesin-2                                                               | 17                 | 0.9678                                 | < 0.0001       | 0.8385                                 | < 0.0001       | 0.9392                                 | < 0.0001       | 0.7827                                 | 0.0002         |
| Myosin light chain 1/3, skeletal muscle isoform                          | 16                 | 0.705                                  | 0.0023         | 0.6892                                 | 0.0031         | 0.5345                                 | 0.0271         | 0.668                                  | 0.0034         |
| Myosin regulatory light chain 2, skeletal muscle isoform                 | 16                 | 0.871                                  | < 0.0001       | 0.7218                                 | 0.0016         | 0.7901                                 | 0.0002         | 0.4922                                 | 0.0447         |
| Myosin-2                                                                 | 16                 | 0.8848                                 | < 0.0001       | 0.7789                                 | 0.0004         | 0.8813                                 | < 0.0001       | 0.5737                                 | 0.0202         |
| Myosin-4                                                                 | 15                 | 0.9106                                 | < 0.0001       | 0.7274                                 | 0.0021         | 0.8577                                 | < 0.0001       | 0.5064                                 | 0.0453         |
| Myosin-6                                                                 | 17                 | 0.7624                                 | 0.0004         | 0.6003                                 | 0.0108         | 0.7533                                 | 0.0005         | 0.5575                                 | 0.0201         |
| Myosin-7                                                                 | 16                 | 0.7724                                 | 0.0005         | 0.622                                  | 0.011          | 0.7456                                 | 0.0006         | 0.5518                                 | 0.0216         |
| PDZ and LIM domain protein 3                                             | 13                 | 0.8716                                 | 0.0001         | 0.9448                                 | < 0.0001       | 0.776                                  | 0.0018         | 0.8643                                 | 0.0003         |
| Titin                                                                    | 16                 | 0.8155                                 | 0.0001         | 0.7043                                 | 0.0023         | 0.878                                  | < 0.0001       | 0.7569                                 | 0.0017         |
| Tropomyosin alpha-1 chain                                                | 17                 | 0.9369                                 | < 0.0001       | 0.8489                                 | < 0.0001       | 0.8997                                 | < 0.0001       | 0.7926                                 | 0.0001         |
| Tropomyosin alpha-3 chain                                                | 17                 | 0.7989                                 | 0.0001         | 0.7543                                 | 0.0005         | 0.7562                                 | 0.0004         | 0.7243                                 | 0.001          |
| Tropomyosin beta chain                                                   | 17                 | 0.7314                                 | 0.0008         | 0.6454                                 | 0.0051         | 0.8047                                 | < 0.0001       | 0.7328                                 | 0.0008         |
| Troponin C, skeletal muscle                                              | 15                 | 0.7177                                 | 0.0026         | 0.6303                                 | 0.0118         | 0.7102                                 | 0.003          | 0.6228                                 | 0.0131         |
| Troponin C, slow skeletal and cardiac muscles                            | 14                 | 0.8882                                 | < 0.0001       | 0.7912                                 | 0.0007         | 0.8359                                 | 0.0002         | 0.7701                                 | 0.0013         |
| Troponin I, fast skeletal muscle                                         | 17                 | 0.9444                                 | < 0.0001       | 0.9115                                 | < 0.0001       | 0.8961                                 | < 0.0001       | 0.8021                                 | 0.0001         |
| Troponin T, slow skeletal muscle                                         | 11                 | 0.8102                                 | 0.0025         | 0.8445                                 | 0.0011         | 0.8731                                 | 0.0004         | 0.6549                                 | 0.0208         |
| <b>Cytoplasm</b>                                                         |                    |                                        |                |                                        |                |                                        |                |                                        |                |
| 14 kDa phosphohistidine phosphatase                                      | 10                 | 0.8182                                 | 0.0038         | 0.7401                                 | 0.0144         | 0.6549                                 | 0.0399         | 0.6552                                 | 0.0207         |
| 14-3-3 protein gamma                                                     | 17                 | 0.9078                                 | < 0.0001       | 0.8461                                 | < 0.0001       | 0.8481                                 | < 0.0001       | 0.7639                                 | 0.0004         |
| 6-phosphofructokinase, muscle type                                       | 17                 | 0.8022                                 | 0.0001         | 0.748                                  | 0.0006         | 0.8156                                 | < 0.0001       | 0.7204                                 | 0.0011         |
| Actin, cytoplasmic 2                                                     | 17                 | 0.7765                                 | 0.0002         | 0.6318                                 | 0.0065         | 0.7614                                 | 0.0004         | 0.6122                                 | 0.009          |
| Adenylate kinase isoenzyme 1                                             | 16                 | 0.8409                                 | < 0.0001       | 0.768                                  | 0.0005         | 0.7846                                 | 0.0003         | 0.6368                                 | 0.008          |
| ADP/ATP translocase 1                                                    | 17                 | 0.7225                                 | 0.0011         | 0.5866                                 | 0.0133         | 0.7275                                 | 0.0009         | 0.6014                                 | 0.0107         |
| Aldose reductase                                                         | 16                 | 0.8958                                 | < 0.0001       | 0.7989                                 | 0.0002         | 0.8171                                 | 0.0001         | 0.5983                                 | 0.0144         |
| Alpha-actinin-2                                                          | 13                 | 0.8373                                 | 0.0004         | 0.6666                                 | 0.0128         | 0.8449                                 | 0.0003         | 0.7283                                 | 0.0048         |
| Alpha-crystallin B chain                                                 | 17                 | 0.8704                                 | < 0.0001       | 0.9478                                 | < 0.0001       | 0.7917                                 | 0.0002         | 0.8251                                 | < 0.0001       |
| Alpha-enolase                                                            | 17                 | 0.9197                                 | < 0.0001       | 0.7515                                 | 0.0005         | 0.8234                                 | < 0.0001       | 0.7185                                 | 0.0012         |
| Aspartate aminotransferase, cytoplasmic                                  | 17                 | 0.8818                                 | < 0.0001       | 0.8152                                 | < 0.0001       | 0.8484                                 | < 0.0001       | 0.6684                                 | 0.0034         |
| Beta-actin-like protein 2                                                | 17                 | 0.7949                                 | 0.0001         | 0.6862                                 | 0.0024         | 0.7814                                 | 0.0002         | 0.5948                                 | 0.0118         |
| Beta-enolase                                                             | 17                 | 0.9496                                 | < 0.0001       | 0.82                                   | < 0.0001       | 0.871                                  | < 0.0001       | 0.7687                                 | 0.0003         |
| Carbonic anhydrase 2                                                     | 16                 | 0.7644                                 | 0.0006         | 0.9032                                 | < 0.0001       | 0.6097                                 | 0.0122         | 0.8421                                 | < 0.0001       |
| Carbonic anhydrase 3                                                     | 17                 | 0.9308                                 | < 0.0001       | 0.8136                                 | < 0.0001       | 1                                      |                |                                        |                |
| Carboxymethylenebutenolidase homolog                                     | 15                 | 0.7652                                 | 0.0009         | 0.8604                                 | < 0.0001       | 0.6768                                 | 0.0056         | 0.7245                                 | 0.0015         |
| Cofilin-1                                                                | 16                 | 0.8399                                 | < 0.0001       | 0.8987                                 | < 0.0001       | 0.7673                                 | 0.0005         | 0.7058                                 | 0.0022         |
| Cofilin-2                                                                | 16                 | 0.8585                                 | < 0.0001       | 0.8834                                 | < 0.0001       | 0.7928                                 | 0.0002         | 0.7215                                 | 0.0016         |
| Creatine kinase M-type                                                   | 17                 | 1                                      |                |                                        |                | 0.9308                                 | < 0.0001       | 0.8216                                 | < 0.0001       |
| Cytosolic 10-formyltetrahydrofolate dehydrogenase                        | 12                 | 0.7433                                 | 0.0056         | 0.8121                                 | 0.0013         | 0.6651                                 | 0.0183         | 0.6462                                 | 0.0317         |
| Elongation factor 1-alpha 2                                              | 16                 | 0.9184                                 | < 0.0001       | 0.8917                                 | < 0.0001       | 0.8234                                 | < 0.0001       | 0.746                                  | 0.0009         |
| Fatty acid-binding protein, heart                                        | 16                 | 0.6148                                 | 0.0113         | 0.5415                                 | 0.0303         | 0.5056                                 | 0.0457         | 0.5183                                 | 0.0397         |
| Filamin-A                                                                | 16                 | 0.8812                                 | < 0.0001       | 0.8763                                 | < 0.0001       | 0.8094                                 | 0.0001         | 0.6617                                 | 0.0052         |
| Flavin reductase (NADPH)                                                 | 17                 | 0.7424                                 | 0.0006         | 0.7087                                 | 0.0015         | 0.7464                                 | 0.0006         | 0.6114                                 | 0.0091         |
| Four and a half LIM domains protein 1                                    | 17                 | 0.9675                                 | < 0.0001       | 0.907                                  | < 0.0001       | 0.9437                                 | < 0.0001       | 0.8181                                 | < 0.0001       |
| Fructose-1,6-bisphosphatase isozyme 2                                    | 16                 | 0.8863                                 | < 0.0001       | 0.758                                  | 0.0007         | 0.7971                                 | 0.0002         | 0.6561                                 | 0.0058         |
| Fructose-bisphosphate aldolase A                                         | 17                 | 0.9616                                 | < 0.0001       | 0.8894                                 | < 0.0001       | 0.8722                                 | < 0.0001       | 0.8169                                 | < 0.0001       |
| Gamma-enolase                                                            | 17                 | 0.8979                                 | < 0.0001       | 0.7216                                 | 0.0011         | 0.7882                                 | 0.0002         | 0.6899                                 | 0.0022         |
| Glucose-6-phosphate isomerase                                            | 17                 | 0.9104                                 | < 0.0001       | 0.8136                                 | < 0.0001       | 0.8282                                 | < 0.0001       | 0.7383                                 | 0.0007         |
| Glutathione S-transferase Mu 1                                           | 13                 | 0.6634                                 | 0.0134         | 0.7674                                 | 0.0022         | 0.57                                   | 0.042          | 0.6868                                 | 0.0095         |
| Glutathione S-transferase Mu 2                                           | 16                 | 0.6945                                 | 0.0028         | 0.7758                                 | 0.0004         | 0.5709                                 | 0.0209         | 0.6458                                 | 0.0069         |
| Glutathione S-transferase Mu 4                                           | 13                 | 0.6613                                 | 0.0138         | 0.6795                                 | 0.0106         | 0.673                                  | 0.0117         | 0.6502                                 | 0.0161         |
| Glycerolaldehyde-3-phosphate dehydrogenase                               | 17                 | 0.9552                                 | < 0.0001       | 0.8622                                 | < 0.0001       | 0.9271                                 | < 0.0001       | 0.7353                                 | 0.0008         |
| Glycerol-3-phosphate dehydrogenase [NAD+], cytoplasmic                   | 16                 | 0.9128                                 | < 0.0001       | 0.8634                                 | < 0.0001       | 0.8005                                 | 0.0002         | 0.6696                                 | 0.0045         |
| Glycogen debranching enzyme                                              | 17                 | 0.8655                                 | < 0.0001       | 0.8963                                 | < 0.0001       | 0.8172                                 | < 0.0001       | 0.8144                                 | < 0.0001       |
| Glycogen phosphorylase, muscle form                                      | 17                 | 0.8895                                 | < 0.0001       | 0.8861                                 | < 0.0001       | 0.84                                   | < 0.0001       | 0.8648                                 | < 0.0001       |
| Heat shock 70 kDa protein 1A/1B                                          | 17                 | 0.743                                  | 0.0006         | 0.7668                                 | 0.0003         | 0.558                                  | 0.0199         | 0.6693                                 | 0.0033         |
| Heat shock cognate 71 kDa protein                                        | 16                 | 0.9148                                 | < 0.0001       | 0.8834                                 | < 0.0001       | 0.8711                                 | < 0.0001       | 0.712                                  | 0.002          |
| Heat shock protein beta-1                                                | 16                 | 0.9142                                 | < 0.0001       | 0.9016                                 | < 0.0001       | 0.8188                                 | 0.0001         | 0.7783                                 | 0.0004         |
| Heat shock protein beta-6                                                | 17                 | 0.8065                                 | < 0.0001       | 0.7956                                 | 0.0001         | 0.7178                                 | 0.0012         | 0.7431                                 | 0.0006         |
| Heat shock-related 70 kDa protein 2                                      | 16                 | 0.8964                                 | < 0.0001       | 0.8293                                 | < 0.0001       | 0.8875                                 | < 0.0001       | 0.6148                                 | 0.0113         |
| Kelch repeat and BTB domain-containing protein 10                        | 11                 | 0.8272                                 | 0.0017         | 0.8917                                 | 0.0002         | 0.654                                  | 0.0291         | 0.7848                                 | 0.0042         |
| L-lactate dehydrogenase A chain                                          | 17                 | 0.8993                                 | < 0.0001       | 0.8345                                 | < 0.0001       | 0.8855                                 | < 0.0001       | 0.7475                                 | 0.0006         |
| L-lactate dehydrogenase B chain                                          | 17                 | 0.9087                                 | < 0.0001       | 0.9049                                 | < 0.0001       | 0.9093                                 | < 0.0001       | 0.7527                                 | 0.0005         |
| Malate dehydrogenase, cytoplasmic                                        | 17                 | 0.8725                                 | < 0.0001       | 0.8736                                 | < 0.0001       | 0.8126                                 | < 0.0001       | 0.7587                                 | 0.0004         |
| Myoglobin                                                                | 17                 | 0.9591                                 | < 0.0001       | 0.8478                                 | < 0.0001       | 0.8598                                 | < 0.0001       | 0.8432                                 | < 0.0001       |
| Nucleoside diphosphate kinase B                                          | 16                 | 0.6087                                 | 0.0123         | 0.5412                                 | 0.0304         | 0.5321                                 | 0.0339         | 0.6266                                 | 0.0094         |
| Peroxiredoxin-1                                                          | 16                 | 0.7574                                 | 0.0007         | 0.8188                                 | 0.0001         | 0.606                                  | 0.0128         | 0.6381                                 | 0.0078         |
| Peroxiredoxin-6                                                          | 17                 | 0.7769                                 | 0.0002         | 0.8336                                 | < 0.0001       | 0.6398                                 | 0.0057         | 0.7938                                 | 0.0001         |
| Phosphatidylethanolamine-binding protein 1                               | 17                 | 0.6793                                 | 0.0027         | 0.8389                                 | < 0.0001       | 0.5093                                 | 0.0368         | 0.772                                  | 0.0003         |
| Phosphoglucomutase-1                                                     | 17                 | 0.9305                                 | < 0.0001       | 0.8994                                 | < 0.0001       | 0.9064                                 | < 0.0001       | 0.766                                  | 0.0003         |
| Phosphoglycerate kinase 1                                                | 17                 | 0.8862                                 | < 0.0001       | 0.7583                                 | 0.0004         | 0.8911                                 | < 0.0001       | 0.692                                  | 0.0021         |
| Phosphoglycerate mutase 1                                                | 17                 | 0.9382                                 | < 0.0001       | 0.793                                  | 0.0001         | 0.8928                                 | < 0.0001       | 0.7542                                 | 0.0005         |
| Phosphoglycerate mutase 2                                                | 17                 | 0.8786                                 | < 0.0001       | 0.8199                                 | < 0.0001       | 0.7981                                 | 0.0001         | 0.7389                                 | 0.0007         |
| Phosphorylase b kinase regulatory subunit alpha, skeletal muscle isoform | 16                 | 0.7209                                 | 0.0016         | 0.7123                                 | 0.002          | 0.747                                  | 0.0009         | 0.6795                                 | 0.0038         |
| Plectin                                                                  | 14                 | 0.8408                                 | 0.0002         | 0.8485                                 | 0.0001         | 0.7679                                 | 0.0013         | 0.8783                                 | < 0.0001       |
| POTE ankyrin domain family member E                                      | 17                 | 0.817                                  | < 0.0001       | 0.6836                                 | 0.0025         | 0.8034                                 | 0.0001         | 0.5525                                 | 0.0214         |

|                                                                 |    |        |          |        |          |        |          |        |          |
|-----------------------------------------------------------------|----|--------|----------|--------|----------|--------|----------|--------|----------|
| Protein DJ-1                                                    | 17 | 0.7644 | 0.0004   | 0.8162 | < 0.0001 | 0.6547 | 0.0043   | 0.7458 | 0.0006   |
| Purine nucleoside phosphorylase                                 | 10 | 0.8797 | 0.0008   | 0.8968 | 0.0004   | 0.8421 | 0.0022   | 0.8102 | 0.0045   |
| Pyruvate kinase isozymes M1/M2                                  | 17 | 0.9188 | < 0.0001 | 0.8613 | < 0.0001 | 0.8557 | < 0.0001 | 0.7671 | 0.0003   |
| SH3 domain-binding glutamic acid-rich protein                   | 15 | 0.8178 | 0.0002   | 0.835  | 0.0001   | 0.7784 | 0.0006   | 0.7178 | 0.0057   |
| Superoxide dismutase [Cu-Zn]                                    | 15 | 0.9208 | < 0.0001 | 0.7539 | 0.0012   | 0.946  | < 0.0001 | 0.6532 | 0.0083   |
| Thioredoxin                                                     | 8  | 0.9148 | 0.0014   | 0.9314 | 0.0008   | 0.7154 | 0.046    | 0.8252 | 0.0062   |
| Triosephosphate isomerase                                       | 17 | 0.9635 | < 0.0001 | 0.8843 | < 0.0001 | 0.911  | < 0.0001 | 0.7943 | 0.0001   |
| Tubulin alpha-4A chain                                          | 14 | 0.7285 | 0.0031   | 0.7604 | 0.0016   | 0.6237 | 0.0171   | 0.5571 | 0.0385   |
| Ubiquitin-like modifier-activating enzyme 1                     | 17 | 0.8794 | < 0.0001 | 0.7779 | 0.0002   | 0.8234 | < 0.0001 | 0.7306 | 0.0009   |
| UTP--glucose-1-phosphate uridylyltransferase                    | 16 | 0.7929 | 0.0002   | 0.8207 | < 0.0001 | 0.6938 | 0.0029   | 0.7882 | 0.0003   |
| Vinculin                                                        | 16 | 0.8305 | < 0.0001 | 0.9087 | < 0.0001 | 0.6938 | 0.0029   | 0.7508 | 0.0008   |
| <b>Mitochondrion</b>                                            |    |        |          |        |          |        |          |        |          |
| 2-oxoglutarate dehydrogenase, mitochondrial                     | 17 | 0.8593 | < 0.0001 | 0.8676 | < 0.0001 | 0.8579 | < 0.0001 | 0.7298 | 0.0009   |
| 60 kDa heat shock protein, mitochondrial                        | 16 | 0.8311 | < 0.0001 | 0.7926 | 0.0003   | 0.6971 | 0.0027   | 0.6656 | 0.0049   |
| Acetyl-CoA acetyltransferase, mitochondrial                     | 17 | 0.6441 | 0.0053   | 0.7329 | 0.0008   | 0.6341 | 0.0063   | 0.6834 | 0.0025   |
| Aconitate hydratase, mitochondrial                              | 17 | 0.8108 | < 0.0001 | 0.7116 | 0.0014   | 0.7616 | 0.0004   | 0.6818 | 0.0026   |
| Aspartate aminotransferase, mitochondrial                       | 17 | 0.8987 | < 0.0001 | 0.8613 | < 0.0001 | 0.794  | 0.0001   | 0.8102 | < 0.0001 |
| ATP synthase subunit alpha, mitochondrial                       | 17 | 0.8629 | < 0.0001 | 0.8161 | < 0.0001 | 0.8001 | 0.0001   | 0.7608 | 0.0004   |
| ATP synthase subunit b, mitochondrial                           | 14 | 0.6518 | 0.0115   | 0.82   | 0.0003   | 0.5744 | 0.0317   | 0.7538 | 0.0018   |
| ATP synthase subunit beta, mitochondrial                        | 17 | 0.8801 | < 0.0001 | 0.8316 | < 0.0001 | 0.7746 | 0.0003   | 0.7929 | 0.0001   |
| Citrate synthase, mitochondrial                                 | 16 | 0.6703 | 0.0045   | 0.5543 | 0.0259   | 0.6781 | 0.0039   | 0.5347 | 0.0329   |
| Creatine kinase S-type, mitochondrial                           | 17 | 0.841  | < 0.0001 | 0.7516 | 0.0005   | 0.7919 | 0.0002   | 0.7073 | 0.0015   |
| Cytochrome c                                                    | 8  | 0.8521 | 0.0072   | 0.7709 | 0.0251   | 0.8298 | 0.0108   | 0.6644 | 0.0361   |
| Dihydropyridol dehydrogenase, mitochondrial                     | 16 | 0.9037 | < 0.0001 | 0.775  | 0.0004   | 0.9481 | < 0.0001 | 0.7273 | 0.0014   |
| Enoyl-CoA hydratase, mitochondrial                              | 16 | 0.8553 | < 0.0001 | 0.7808 | 0.0004   | 0.8303 | < 0.0001 | 0.6966 | 0.0027   |
| ES1 protein homolog, mitochondrial                              | 14 | 0.7316 | 0.0029   | 0.6684 | 0.009    | 0.573  | 0.0322   | 0.6557 | 0.0109   |
| Fumarate hydratase, mitochondrial                               | 17 | 0.861  | < 0.0001 | 0.8126 | < 0.0001 | 0.8545 | < 0.0001 | 0.6702 | 0.0032   |
| Hydroxyacyl-coenzyme A dehydrogenase, mitochondrial             | 17 | 0.4947 | 0.0435   | 0.6665 | 0.0035   | 0.4833 | 0.0494   | 0.5623 | 0.0188   |
| Isocitrate dehydrogenase [NADP], mitochondrial                  | 16 | 0.7448 | 0.0009   | 0.837  | < 0.0001 | 0.5366 | 0.0321   | 0.7845 | 0.0003   |
| Malate dehydrogenase, mitochondrial                             | 17 | 0.86   | < 0.0001 | 0.7719 | 0.0003   | 0.8115 | < 0.0001 | 0.7559 | 0.0004   |
| Pyruvate dehydrogenase E1 component subunit beta, mitochondrial | 17 | 0.8366 | < 0.0001 | 0.7021 | 0.0017   | 0.8061 | < 0.0001 | 0.6954 | 0.0019   |
| Superoxide dismutase [Mn], mitochondrial                        | 17 | 0.8146 | < 0.0001 | 0.8644 | < 0.0001 | 0.771  | 0.0003   | 0.7528 | 0.0005   |
| Thioredoxin-dependent peroxide reductase, mitochondrial         | 16 | 0.7835 | 0.0003   | 0.6068 | 0.0127   | 0.7745 | 0.0004   | 0.5935 | 0.0154   |
| Ubiquinone biosynthesis protein COQ9, mitochondrial             | 16 | 0.7608 | 0.0006   | 0.7537 | 0.0007   | 0.647  | 0.0067   | 0.6905 | 0.0031   |
| <b>Endoplasmic Reticulum</b>                                    |    |        |          |        |          |        |          |        |          |
| Sarcoplasmic/endoplasmic reticulum calcium ATPase 1             | 17 | 0.9513 | < 0.0001 | 0.9053 | < 0.0001 | 0.9071 | < 0.0001 | 0.7687 | 0.0003   |
| Sarcoplasmic/endoplasmic reticulum calcium ATPase 2             | 17 | 0.9015 | < 0.0001 | 0.9358 | < 0.0001 | 0.8461 | < 0.0001 | 0.851  | < 0.0001 |
| <b>Nucleus</b>                                                  |    |        |          |        |          |        |          |        |          |
| PWWP domain-containing protein MUM1                             | 6  | 0.9101 | 0.0118   | 0.9284 | 0.0075   | 0.8876 | 0.0182   | 0.8983 | 0.0383   |
